# Supplementary material for: Antiviral activity and mechanism of gossypols: effects of the O2˙− production rate and the chirality
Source: Royal Society of Chemistry journal article supplement (doi:10.1039/c6ra28625a), 2017-01-01
Supplement: c6ra28625a1.pdf [file c6ra28625a1.pdf]

Electronic Supplementary Information (ESI)

## **Antiviral activity and mechanism of gossypols: the $O_2^{\cdot-}$ production rate is one fact, the chirality maybe the other**

*Bin Zhang<sup>a</sup>, Yuxiu Liu<sup>a</sup> Ziwen Wang<sup>a</sup>, Yongqiang Li<sup>a</sup> and Qingmin Wang<sup>a,b\*</sup>*

a State Key Laboratory of Elemento-Organic Chemistry, Research Institute of Elemento-Organic  
Chemistry, Nankai University, Tianjin 300071, People's Republic of China

b Collaborative Innovation Center of Chemical Science and Engineering (Tianjin), Tianjin 300071,  
People's Republic of China

### **Contents:**

**Data for key compounds**-----2-4

**Spectra of key compounds**-----4-22

## Data of experiments -----22-27

### Data for key compounds

**(-)-Gossypol**  $^1\text{H}$  NMR (400 MHz,  $\text{CDCl}_3$ )  $\delta$  15.21 (s, 2H), 11.13 (s, 2H), 7.78 (s, 2H), 7.24 (s, 2H), 6.43 (s, 2H), 5.71 (s, 2H), 3.89 (s, 2H), 2.16 (s, 6H), 1.53 (d,  $J=6.8\text{Hz}$ , 12H);  $^{13}\text{C}$  NMR (100 MHz,  $\text{CDCl}_3$ )  $\delta$  199.4, 156.1, 150.5, 143.4, 134.1, 133.7, 129.7, 118.1, 115.9, 114.7, 111.8, 27.9, 20.4, 20.2;  $[\alpha]_D^{25} = -359.5$  (c 0.26,  $\text{CHCl}_3$ ). Chiral HPLC analysis: retention time: 4.87 min (major), 5.96 min (minor); ee: 97%, [analytical column using MeOH–2% phosphoric acid aqueous solutions= 90:5 as an eluent (1 ml/min), detected at 254 nm.].

**(+)-Gossypol**  $^1\text{H}$  NMR (400 MHz,  $\text{CDCl}_3$ )  $\delta$  15.21 (s, 2H), 11.13 (s, 2H), 7.78 (s, 2H), 7.24 (s, 2H), 6.43 (s, 2H), 5.71 (s, 2H), 3.89 (s, 2H), 2.16 (s, 6H), 1.53 (d,  $J=6.8\text{Hz}$ , 12H);  $^{13}\text{C}$  NMR (100 MHz,  $\text{CDCl}_3$ )  $\delta$  199.4, 156.1, 150.5, 143.4, 134.1, 133.7, 129.7, 118.1, 115.9, 114.7, 111.8, 27.9, 20.4, 20.2;  $[\alpha]_D^{25} = +363.5$  (c 0.105,  $\text{CHCl}_3$ ). Chiral HPLC analysis: time: 4.91 min (minor), 6.09 min (major); ee: 99% [analytical column using MeOH–2% phosphoric acid aqueous solutions= 90:5 as an eluent (1 ml/min), detected at 254 nm.].

**Compound 1**  $^1\text{H}$  NMR (400 MHz,  $\text{DMSO-}d_6$ )  $\delta$  15.38 (d,  $J = 8.4$  Hz, 2H), 10.38 (d,  $J = 8.4$  Hz, 2H), 8.79 (s, 2H), 8.35 (s, 2H), 7.81 (d,  $J = 7.6$  Hz, 2H), 7.75 (t,  $J = 7.2$  Hz, 2H), 7.57 (J = 8.4 Hz, 2H), 7.42 (t,  $J = 7.6$  Hz, 2H), 3.81-3.74 (m, 2H), 2.01 (s, 6H), 1.45-1.40 (m, 12H).  $^{13}\text{C}$  NMR (100 MHz,  $\text{DMSO-}d_6$ )  $\delta$  171.4, 157.2, 151.0, 147.8, 146.2, 140.4, 134.9, 133.6, 131.0, 128.8, 127.3, 126.1, 125.7, 123.0, 121.7, 119.7, 117.6, 115.8, 108.1, 27.1, 20.7. HRMS(ESI)  $m/z$  calcd for  $\text{C}_{44}\text{H}_{37}\text{F}_6\text{N}_2\text{O}_6$  (M–H) $^-$  803.2561, found 803.2541.  $[\alpha]_D^{25} = -1436.5$  (c 0.105,  $\text{CH}_3\text{OH}$ ).

**Compound 2**  $^1\text{H}$  NMR (400 MHz,  $\text{DMSO-}d_6$ )  $\delta$  15.38 (d,  $J=8.4$  Hz, 2H), 10.38 (d,  $J=8.4$  Hz, 2H), 8.78 (s, 2H), 8.35 (s, 2H), 7.82 (d,  $J=7.6\text{Hz}$ , 2H), 7.74 (t,  $J=7.2\text{Hz}$ , 2H), 7.57 (s, 2H), 7.42 (t,  $J=7.6\text{Hz}$ , 2H), 3.81-3.74 (m, 2H), 2.01 (s, 6H), 1.47-1.42 (m, 12H).  $^{13}\text{C}$  NMR (100 MHz,  $\text{DMSO-}d_6$ )  $\delta$  171.4, 157.2, 151.0, 146.2, 140.4, 135.0, 133.6, 131.0, 128.8, 127.3, 126.1, 125.7, 123.0, 121.7, 119.7, 119.3, 117.6, 115.8, 108.0, 27.1, 20.6. HRMS(ESI)  $m/z$  calcd for  $\text{C}_{44}\text{H}_{37}\text{F}_6\text{N}_2\text{O}_6$  (M–H) $^-$  803.2561, found 803.2537.  $[\alpha]_D^{25} = +1430.5$  (c 0.105,  $\text{CH}_3\text{OH}$ ).

**Compound 3**  $^1\text{H}$  NMR (400 MHz,  $\text{DMSO-}d_6$ )  $\delta$  13.29 (d,  $J=12$  Hz, 2H), 9.76 (d,  $J=12$  Hz, 2H), 8.41 (s, 2H), 7.84 (s, 2H), 7.44 (s, 2H), 3.72-3.68 (m, 2H), 3.52-3.45 (m, 4H), 1.93 (s, 6H), 1.66-1.63 (m, 4H), 1.45-1.42 (m, 12H), 0.96-0.92 (m, 6H).  $^{13}\text{C}$  NMR (100 MHz,  $\text{DMSO-}d_6$ )  $\delta$  172.1, 163.0, 150.1, 146.7, 131.6, 127.3, 126.8, 120.6, 117.0, 116.4, 103.5, 52.0, 27.0, 23.8, 20.8, 20.8, 20.7, 11.4. HRMS(ESI)  $m/z$  calcd for  $\text{C}_{36}\text{H}_{43}\text{N}_2\text{O}_6$  (M–H) $^-$  599.3127, found 599.3117.  $[\alpha]_D^{25} = -698.4$  (c 0.105,  $\text{CH}_3\text{OH}$ ).

**Compound 4**  $^1\text{H}$  NMR (400 MHz,  $\text{DMSO-}d_6$ ) 13.29 (d,  $J=12.8$  Hz, 2H), 9.77 (d,  $J=12.8$  Hz, 2H), 8.41 (s, 2H), 7.84 (s, 2H), 7.44 (s, 2H), 3.72-3.68 (m, 2H), 3.51-3.47 (m, 4H), 1.93 (s, 6H), 1.66-1.62 (m, 4H), 1.45-1.42 (m, 12H), 0.95-

0.91 (m, 6H).  $^{13}\text{C}$  NMR (100 MHz,  $\text{DMSO-}d_6$ )  $\delta$  171.5, 162.4, 149.5, 146.2, 131.1, 126.7, 126.3, 120.1, 116.4, 115.8, 103.1, 51.5, 26.5, 23.3, 20.3, 20.3, 20.2, 10.8. HRMS(ESI)  $m/z$  calcd for  $\text{C}_{36}\text{H}_{43}\text{N}_2\text{O}_6$  ( $\text{M-H}^-$ ) 599.3127, found 599.3103.  $[\alpha]_D^{25} = +671.2$  (c 0.105,  $\text{CH}_3\text{OH}$ ).

**Compound 5**  $^1\text{H}$  NMR (400 MHz,  $\text{DMSO-}d_6$ )  $\delta$  13.37 (s, 2H), 9.68 (d,  $J=8\text{Hz}$ , 2H), 8.42 (s, 2H), 7.43 (s, 2H), 4.22(s, 4H), 3.71-3.64 (m, 2H), 1.93 (s, 6H), 1.44 (s, 12H)  $^{13}\text{C}$  NMR (100 MHz,  $\text{DMSO-}d_6$ )  $\delta$  172.3, 162.8, 149.9, 146.3, 131.3, 127.0, 126.7, 120.2, 116.4, 115.8, 103.7, 65.6, 26.5, 20.2. HRMS(ESI)  $m/z$  calcd for  $\text{C}_{32}\text{H}_{35}\text{N}_2\text{O}_{12}\text{S}_2$  ( $\text{M-2Na+H}^-$ ) 703.1637, found 703.1607.  $[\alpha]_D^{25} = -385.7$  (c 0.112,  $\text{CH}_3\text{OH}$ ).

**Compound 6**  $^1\text{H}$  NMR (400 MHz,  $\text{DMSO-}d_6$ )  $\delta$  13.38 (d,  $J=12\text{Hz}$ , 2H), 9.69(d,  $J=12\text{Hz}$ , 2H), 8.44 (s, 2H), 7.43(s, 2H), 4.20 (s, 4H), 3.73-3.68 (m, 2H), 1.92 (s, 6H), 1.43 (s, 12H).  $^{13}\text{C}$  NMR (100 MHz,  $\text{DMSO-}d_6$ )  $\delta$  172.3, 162.8, 149.8, 146.3, 137.6, 131.3, 127.0, 126.7, 120.1, 116.5, 115.8, 103.7, 65.5, 26.5, 20.3. HRMS(ESI)  $m/z$  calcd for  $\text{C}_{32}\text{H}_{35}\text{N}_2\text{O}_{12}\text{S}_2$  ( $\text{M-2Na+H}^-$ ) 703.1637, found 703.1620.  $[\alpha]_D^{25} = +383.6$  (c 0.112,  $\text{CH}_3\text{OH}$ ).

**Compound 7**  $^1\text{H}$  NMR (400 MHz,  $\text{DMSO-}d_6$ )  $\delta$  13.03 (d,  $J=9.6\text{Hz}$ , 2H), 9.76 (d,  $J=9.6\text{Hz}$ , 2H), 8.54 (s, 2H), 7.42 (s, 2H), 3.78 -3.77 (m, 4H), 3.71-3.69 (m, 2H), 2.80-2.84 (m, 4H), 1.93 (s, 6H), 1.44 (s, 12H).  $^{13}\text{C}$  NMR (100 MHz,  $\text{DMSO-}d_6$ )  $\delta$  172.1, 162.2, 150.0, 147.1, 131.5, 127.4, 127.0, 120.7, 116.9, 116.6, 103.2, 50.9, 47.6, 26.5, 20.3. HRMS(ESI)  $m/z$  calcd for  $\text{C}_{34}\text{H}_{39}\text{N}_2\text{O}_{12}\text{S}_2$  ( $\text{M-2Na+H}^-$ ) 731.1950, found 731.1915.  $[\alpha]_D^{27} = -138.48$  (c 0.111,  $\text{CH}_3\text{OH}$ ).

**Compound 8**  $^1\text{H}$  NMR (400 MHz,  $\text{DMSO-}d_6$ )  $\delta$  13.03 (d,  $J=9.6\text{Hz}$ , 2H), 9.76 (d,  $J=9.6\text{Hz}$ , 2H), 8.50 (s, 2H), 7.41 (s, 2H), 3.77 -3.76 (m, 4H), 3.71-3.67 (m, 2H), 2.80-2.84 (m, 4H), 1.93 (s, 6H), 1.44 (s, 12H).  $^{13}\text{C}$  NMR (100 MHz,  $\text{DMSO-}d_6$ )  $\delta$  172.1, 162.2, 150.0, 147.1, 131.5, 127.4, 126.9, 120.7, 116.9, 116.6, 103.7, 51.3, 48.1, 27.0, 20.8. HRMS(ESI)  $m/z$  calcd for  $\text{C}_{34}\text{H}_{39}\text{N}_2\text{O}_{12}\text{S}_2$  ( $\text{M-2Na+H}^-$ ) 731.1950, found 731.1929.  $[\alpha]_D^{27} = +137.38$  (c 0.111,  $\text{CH}_3\text{OH}$ ).

**Compound 9**  $^1\text{H}$  NMR (400 MHz,  $\text{CDCl}_3$ )  $\delta$  14.84 (d,  $J=12\text{Hz}$ , 2H), 10.13 (d,  $J=12\text{Hz}$ , 2H), 8.62 (s, 2H), 8.25-8.23 (m, 4H), 7.69 (s, 2H), 7.38-7.35 (m, 4H), 5.84 (s, 2H), 3.73-3.70 (m, 2H), 2.17 (s, 6H), 1.55-1.51(m, 12H).  $^{13}\text{C}$  NMR (100 MHz,  $\text{DMSO-}d_6$ )  $\delta$  155.7, 152.8, 147.2, 139.7, 138.6, 136.0, 126.3, 125.9, 124.2, 121.3, 117.0, 115.0, 113.6, 113.2, 108.9, 90.1, 26.6, 21.4, 21.3. HRMS(ESI)  $m/z$  calcd for  $\text{C}_{42}\text{H}_{37}\text{N}_4\text{O}_{10}$  ( $\text{M-H}^-$ ) 757.2515, found 757.2486.  $[\alpha]_D^{26} = -563.5$  (c 0.109, DMF).

**Compound 10**  $^1\text{H}$  NMR (400 MHz,  $\text{CDCl}_3$ )  $\delta$  14.84 (d,  $J=12\text{Hz}$ , 2H), 10.12 (d,  $J=12\text{Hz}$ , 2H), 8.62 (s, 2H), 8.25-8.23 (m, 4H), 7.69 (s, 2H), 7.38-7.35 (m, 4H), 5.81 (s, 2H), 3.73-3.70 (m, 2H), 2.17 (s, 6H), 1.55-1.51(m, 12H).  $^{13}\text{C}$  NMR (100 MHz,  $\text{DMSO-}d_6$ )  $\delta$  155.3, 152.3, 146.7, 139.1, 138.1, 138.0, 135.7, 125.8, 125.6, 123.7, 120.9, 114.6, 113.2, 112.7, 108.4, 89.7, 26.1, 20.8, 20.7. HRMS(ESI)  $m/z$  calcd for  $\text{C}_{42}\text{H}_{37}\text{N}_4\text{O}_{10}$  ( $\text{M-H}^-$ ) 757.2515, found 757.2426.  $[\alpha]_D^{27} = +557.8$  (c 0.109, DMF).

## Spectra of key compounds

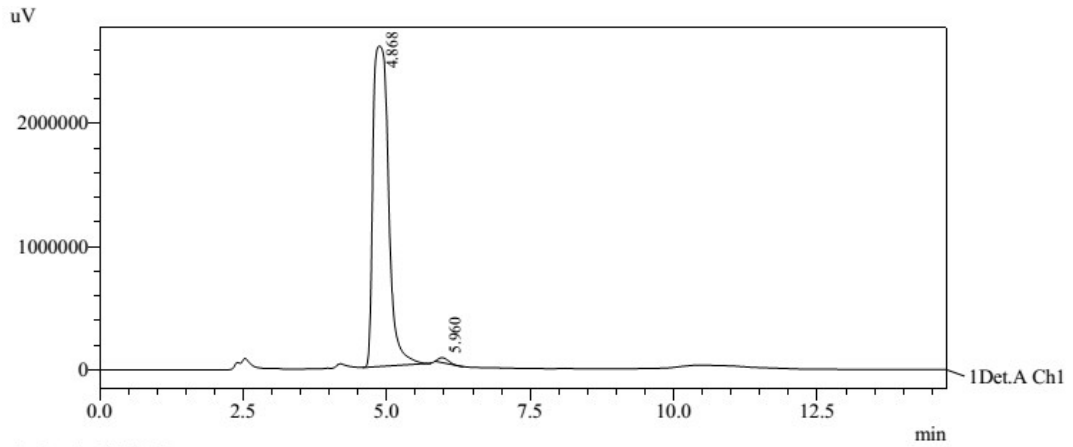

1 Det.A Ch1 / 235nm

PeakTable

| Peak# | Ret. Time | Area     | Height  | Area %  | Height % |
|-------|-----------|----------|---------|---------|----------|
| 1     | 4.868     | 49175924 | 2603540 | 99.060  | 98.508   |
| 2     | 5.960     | 466813   | 39444   | 0.940   | 1.492    |
| Total |           | 49642737 | 2642984 | 100.000 | 100.000  |

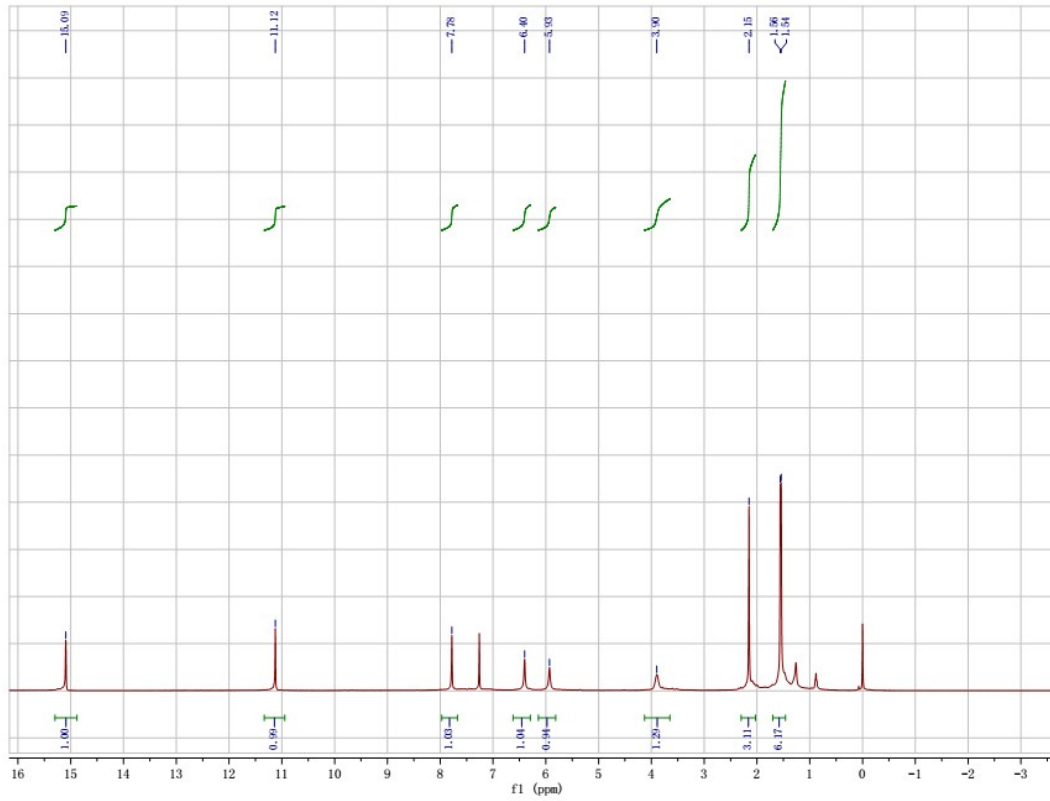

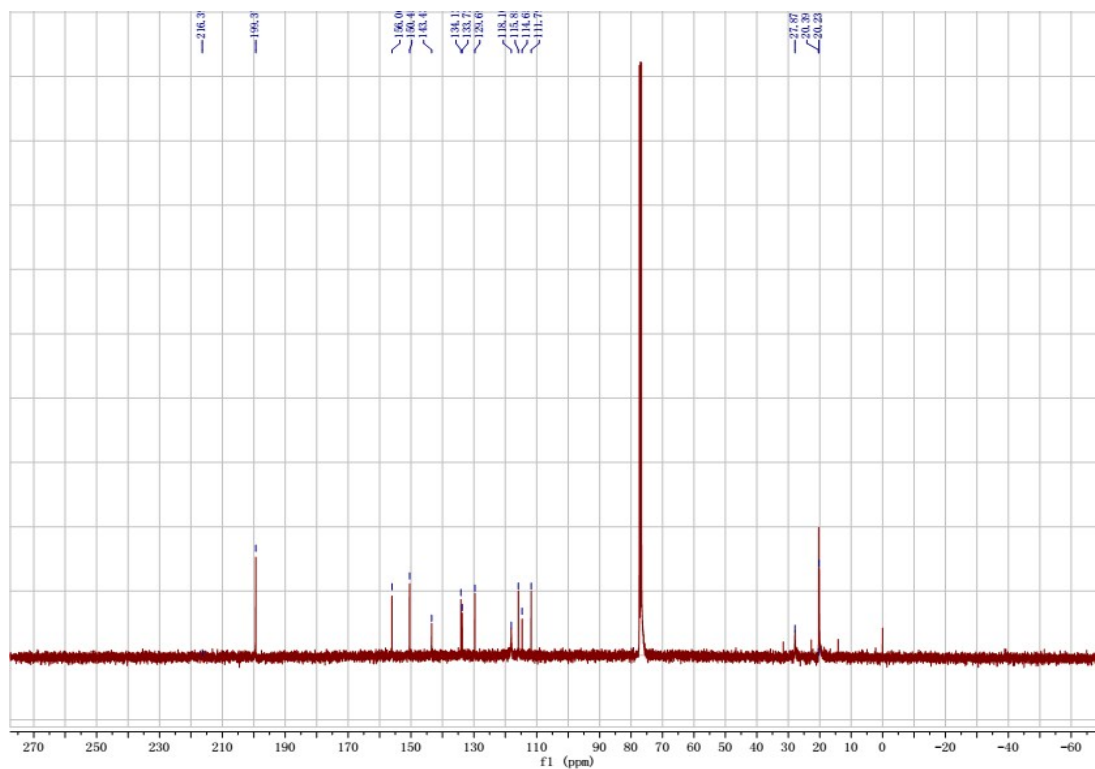

Figure S1. HPLC, <sup>1</sup>H NMR and <sup>13</sup>C NMR of (-)-gossypol.

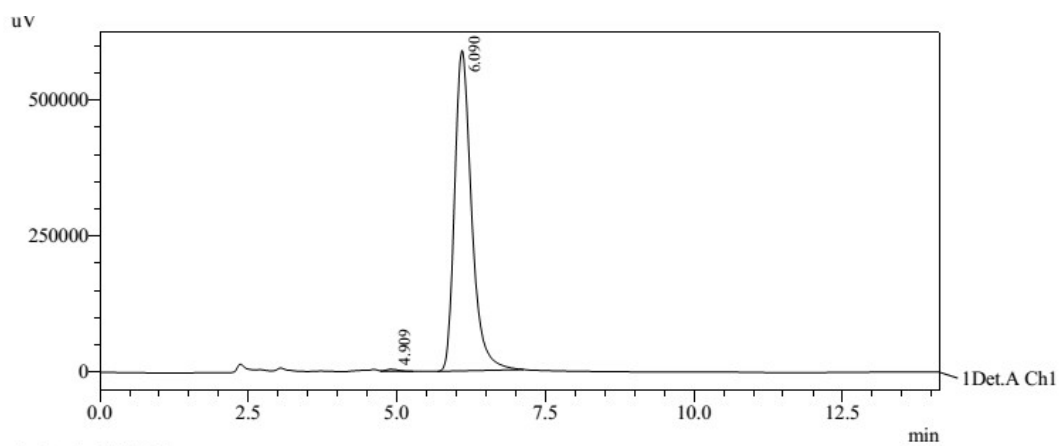

1 Det.A Ch1 / 265nm

PeakTable

| Peak# | Ret. Time | Area     | Height | Area %  | Height % |
|-------|-----------|----------|--------|---------|----------|
| 1     | 4.909     | 48277    | 3527   | 0.411   | 0.596    |
| 2     | 6.090     | 11692765 | 588537 | 99.589  | 99.404   |
| Total |           | 11741041 | 592063 | 100.000 | 100.000  |

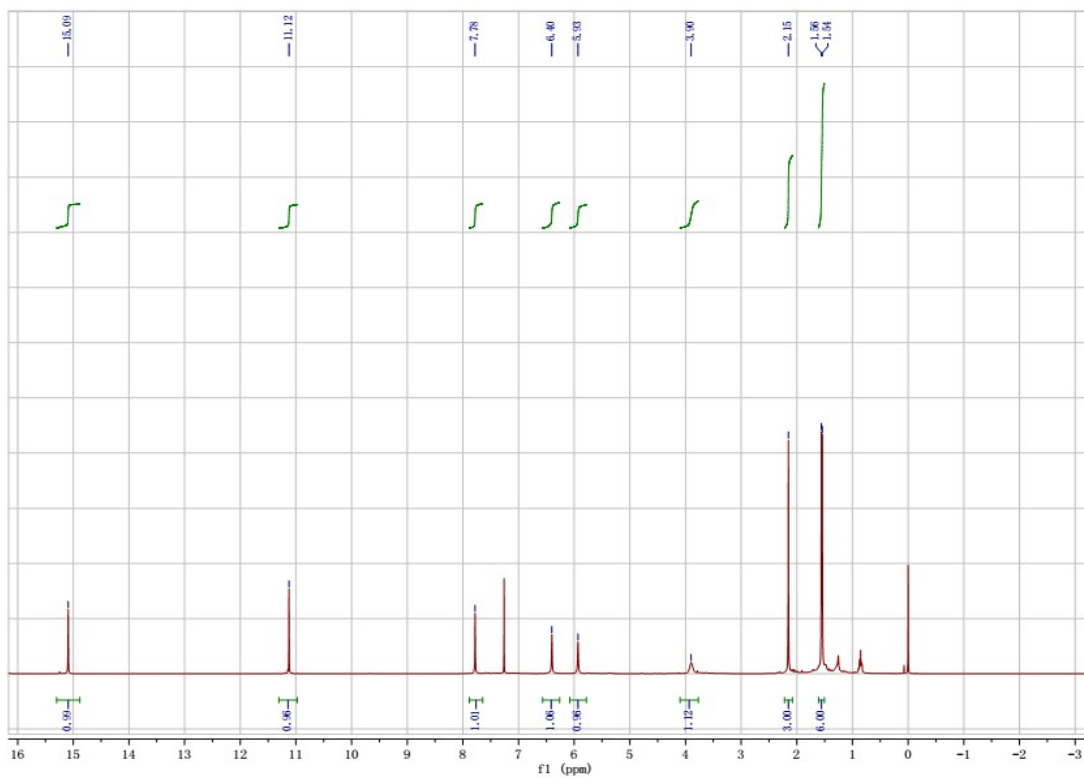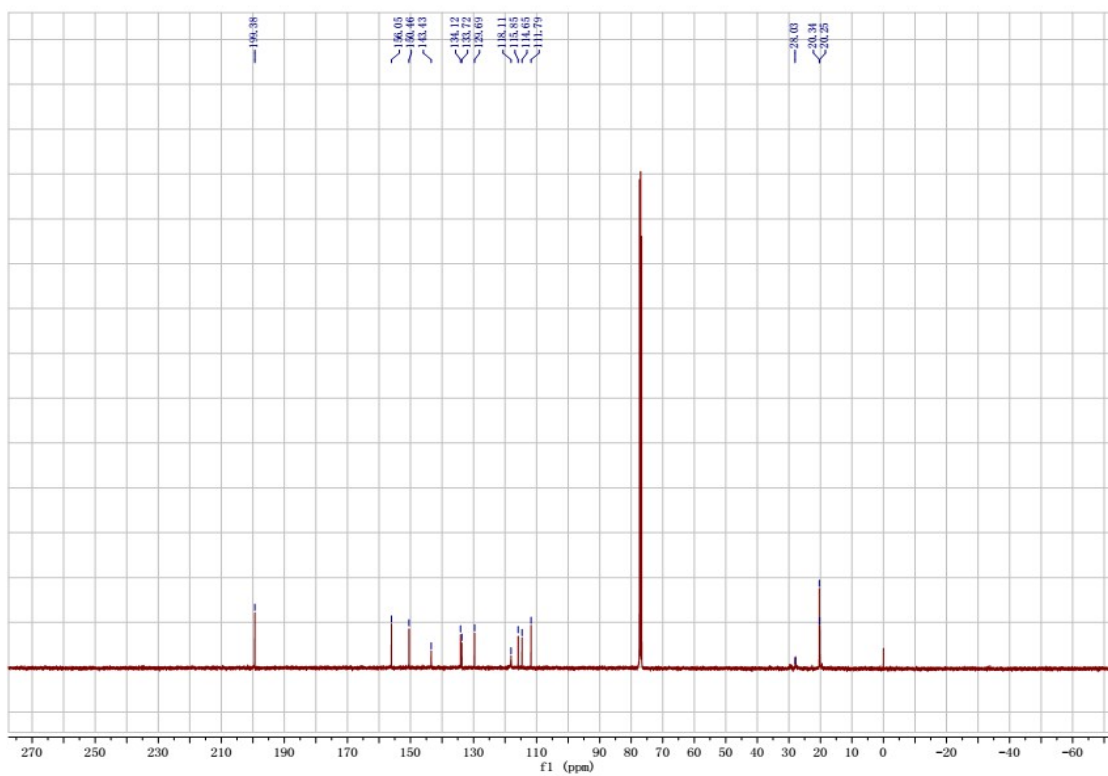

Figure S2. HPLC, <sup>1</sup>H NMR and <sup>13</sup>C NMR of (+)-gossypol.

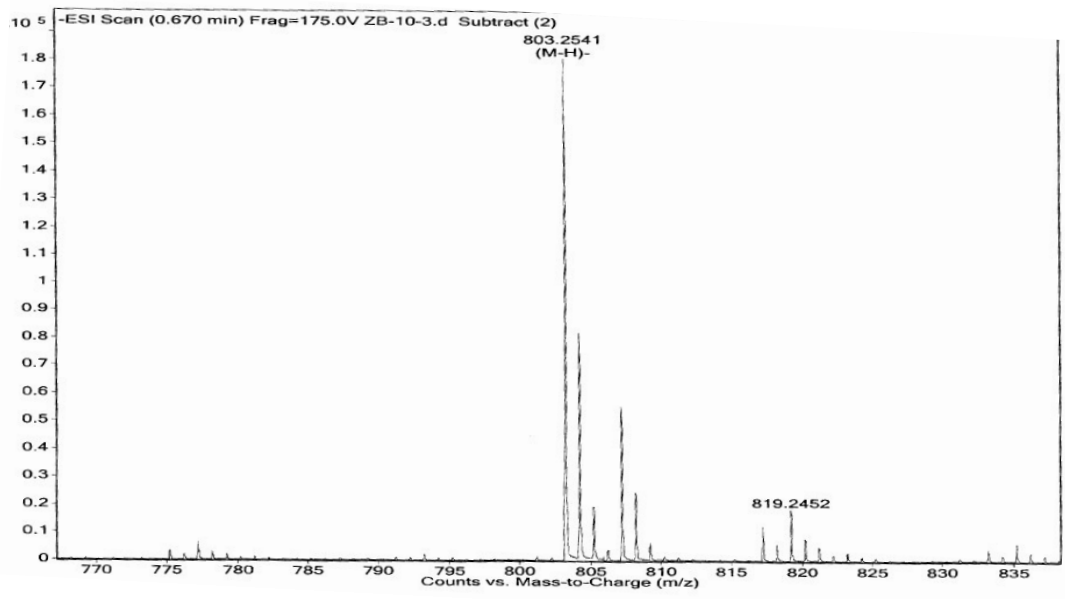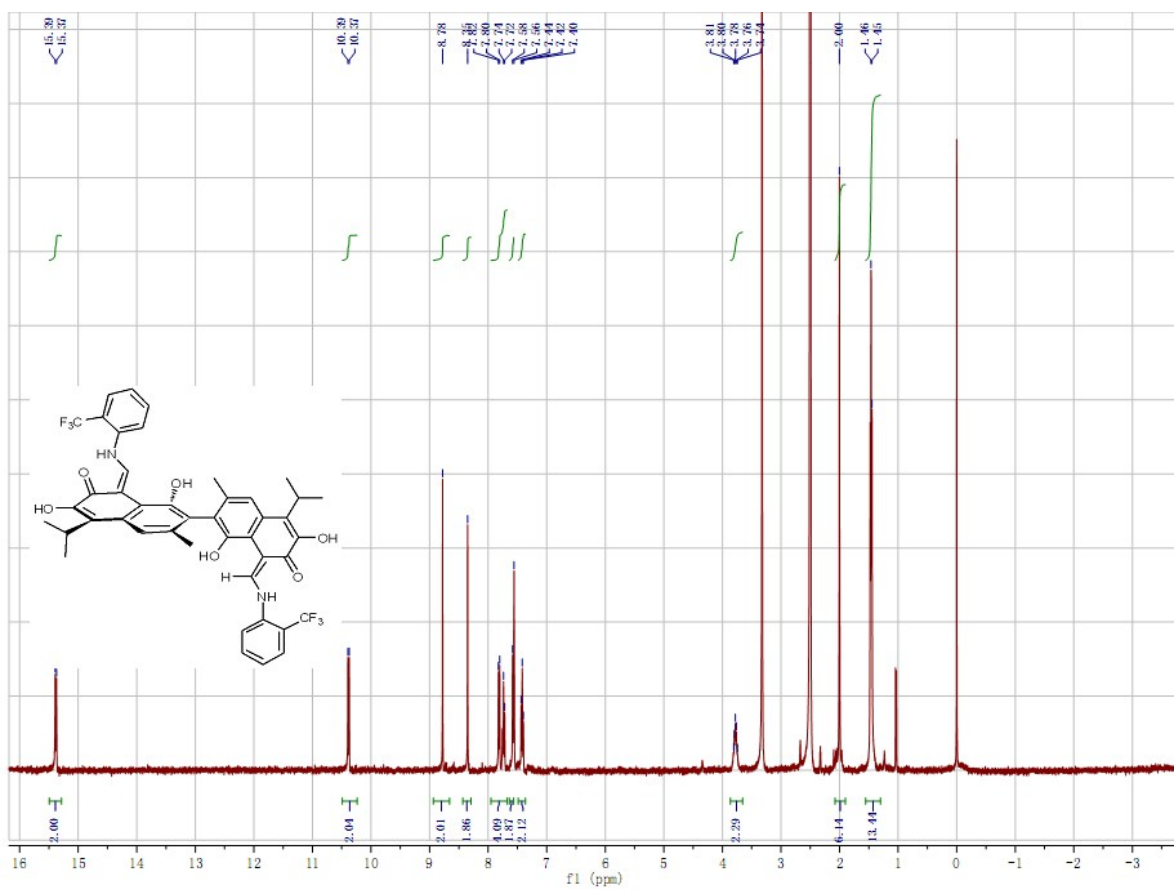

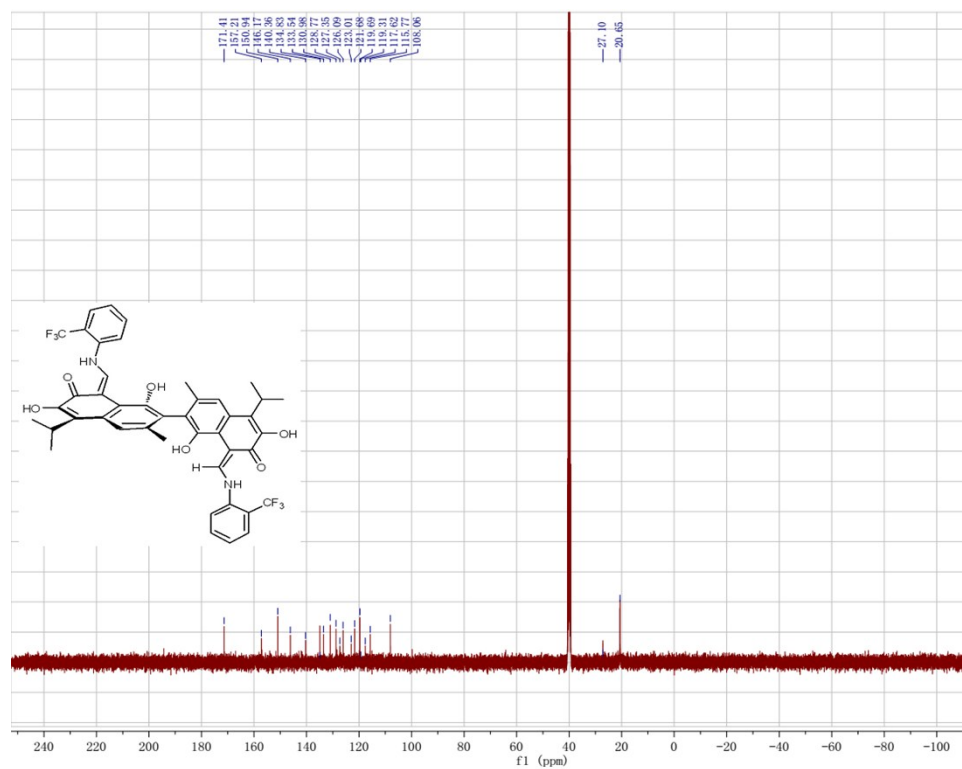

Figure S3. HRMS, <sup>1</sup>H NMR and <sup>13</sup>C NMR of compound 1.

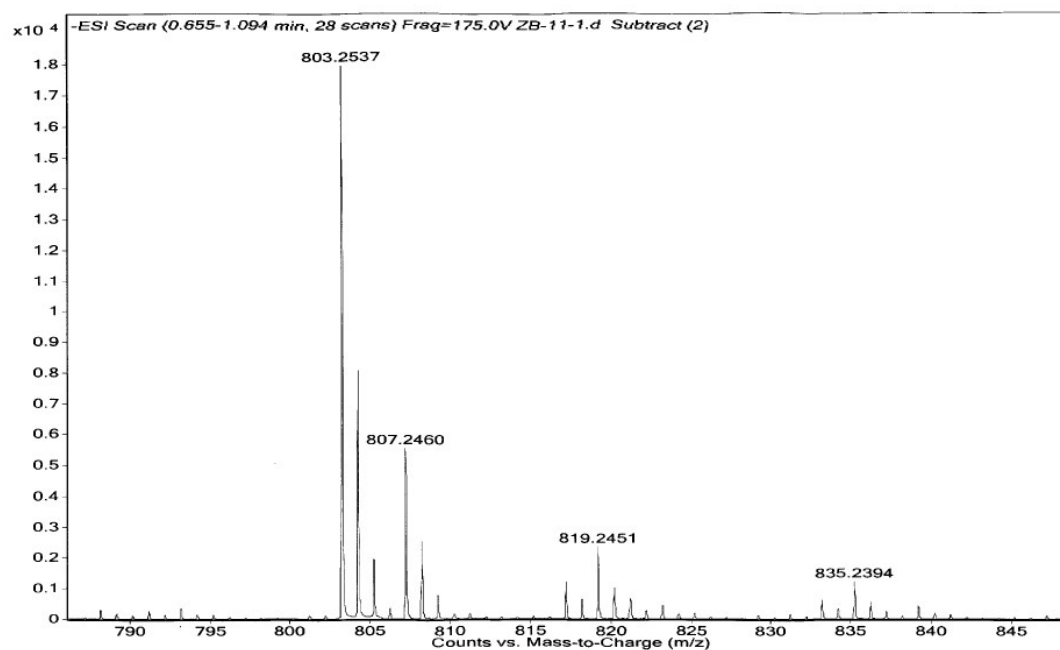



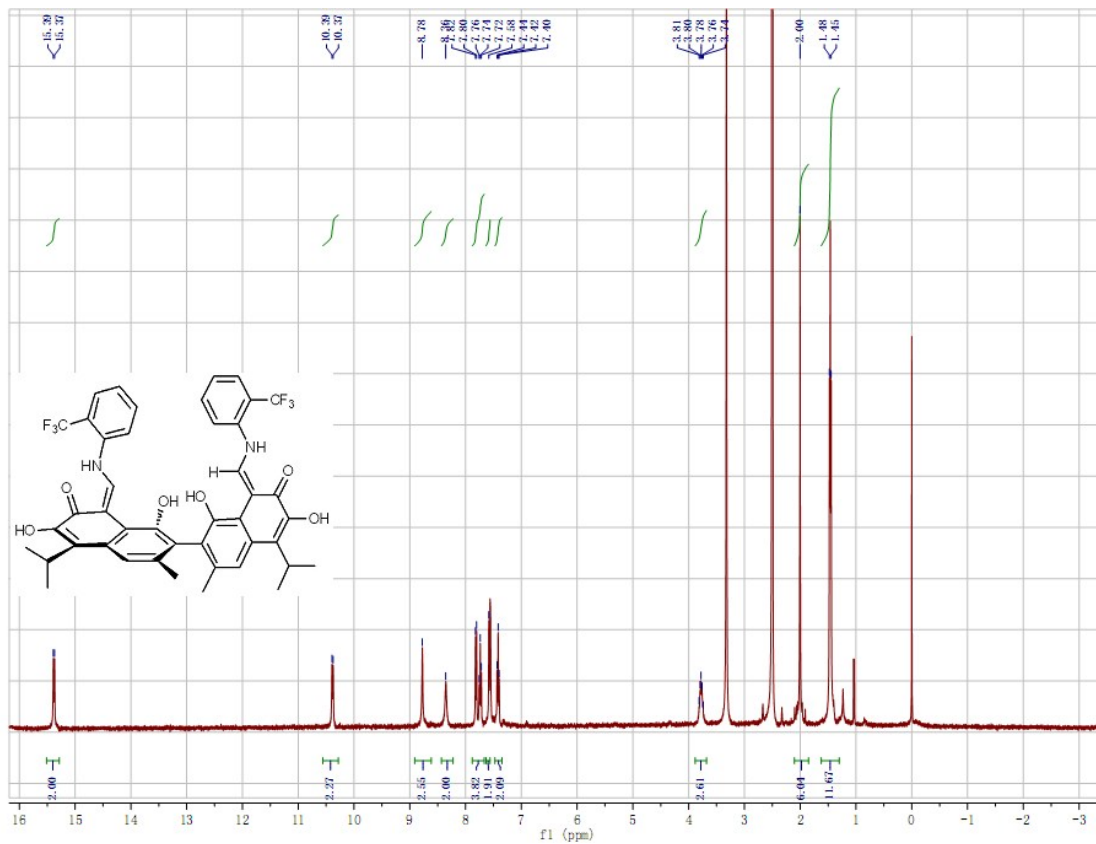

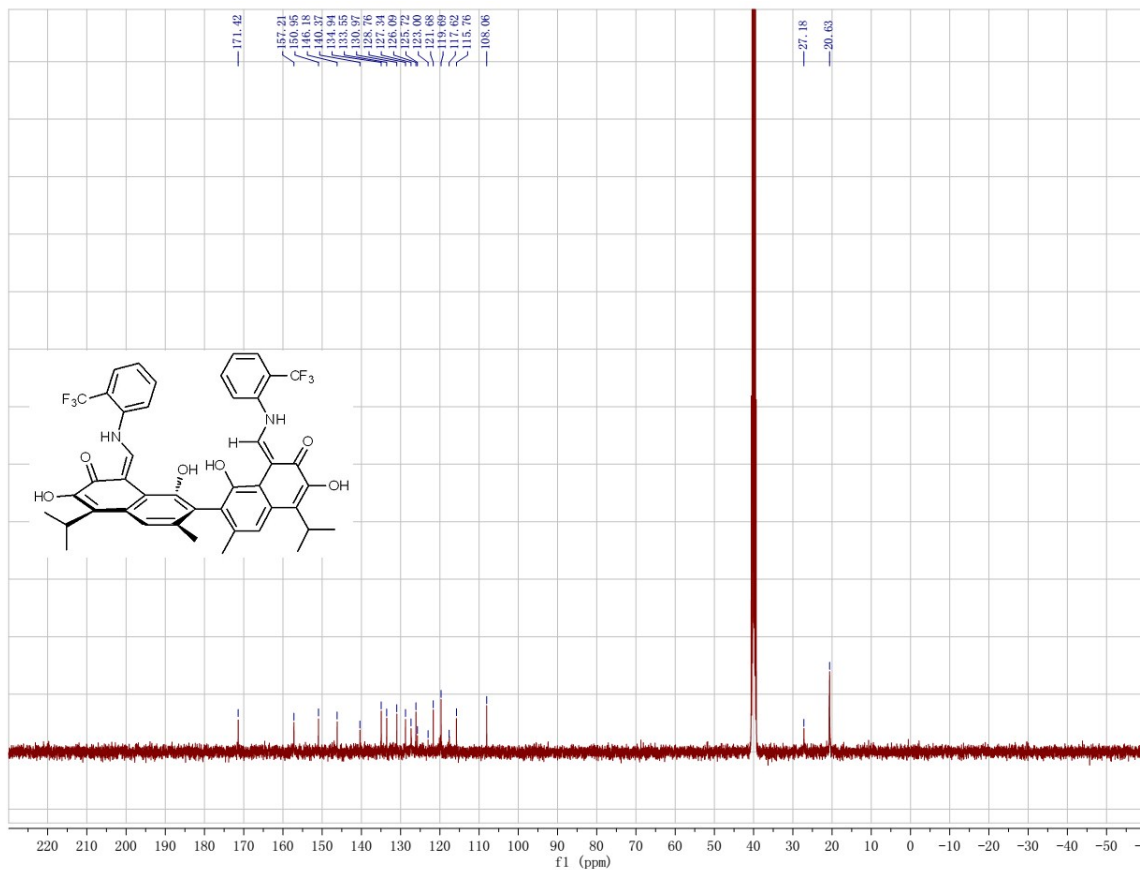

Figure S4. HRMS, <sup>1</sup>H NMR and <sup>13</sup>C NMR of compound 2.

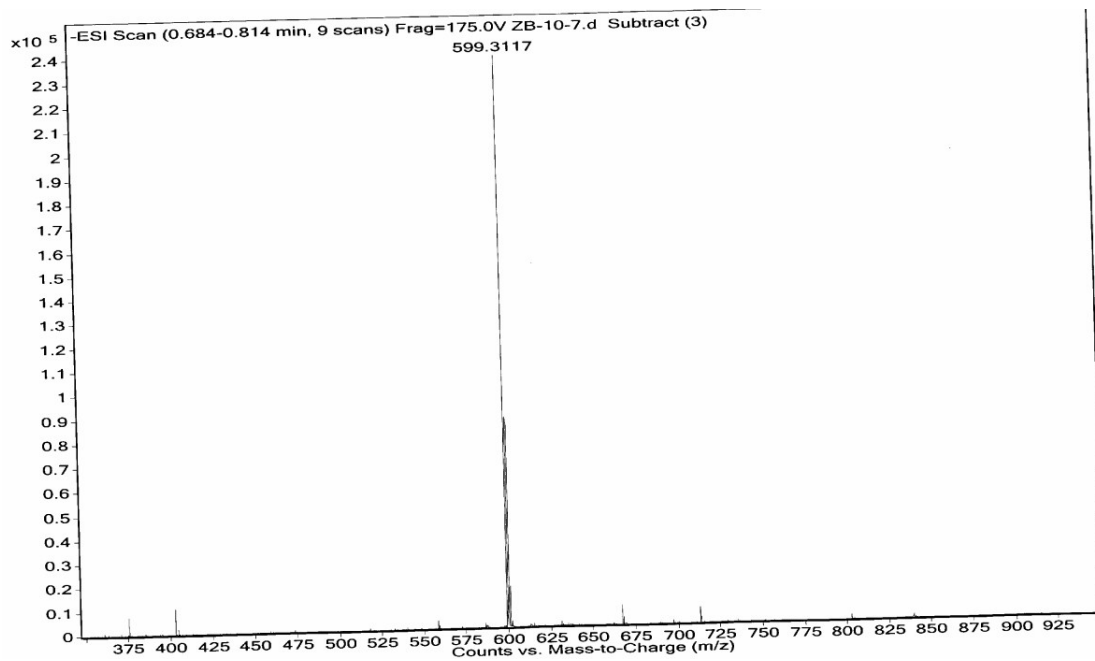

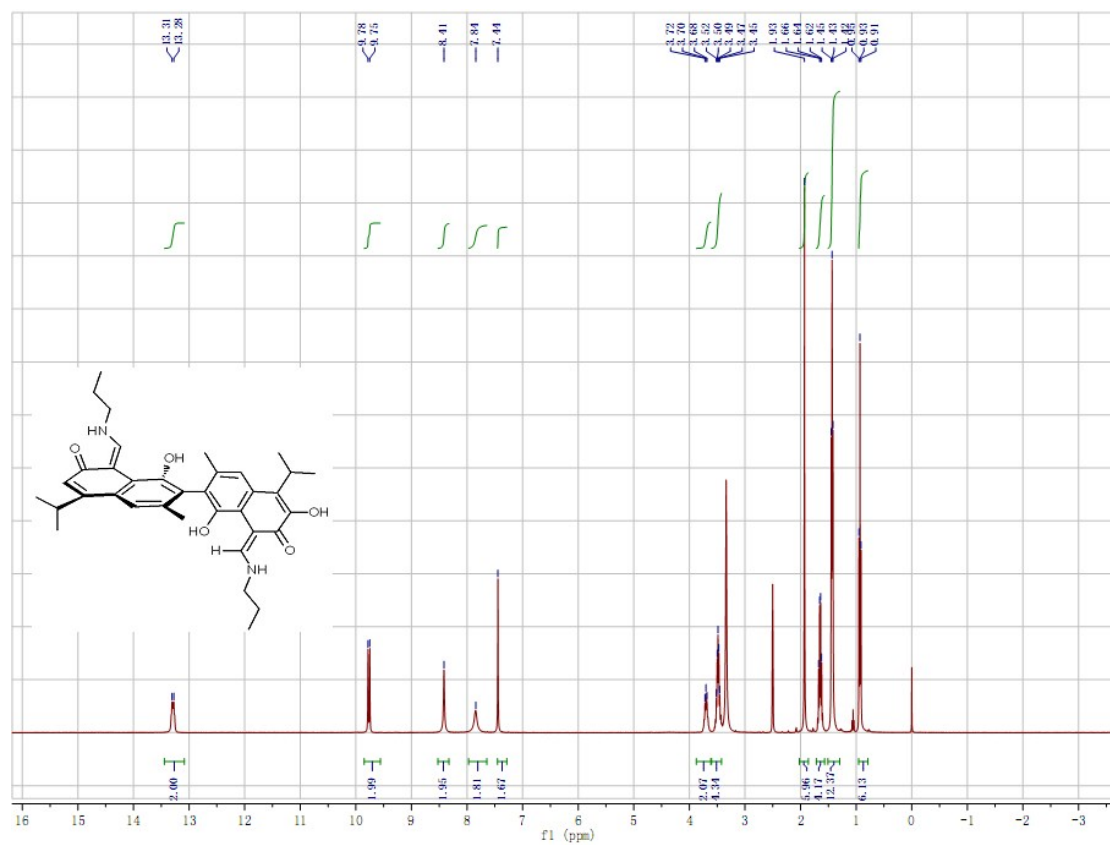

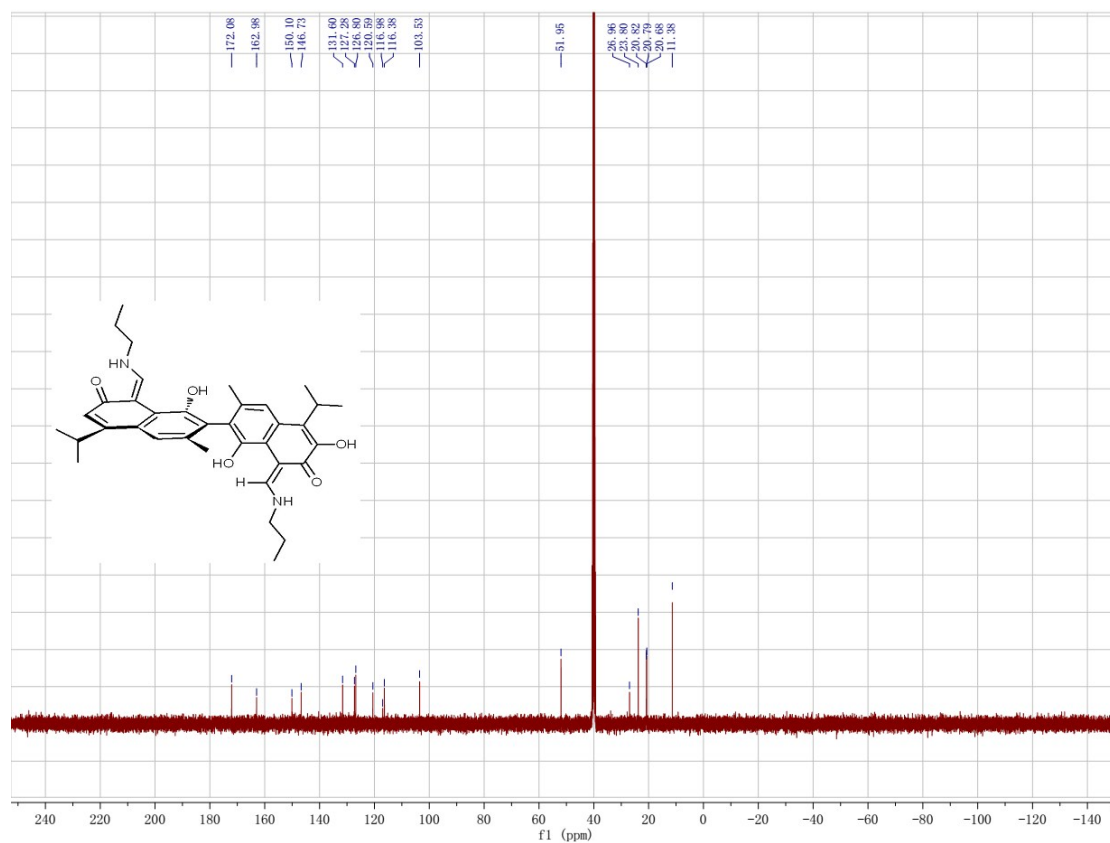

Figure S5. HRMS, <sup>1</sup>H NMR and <sup>13</sup>C NMR of compound 3.

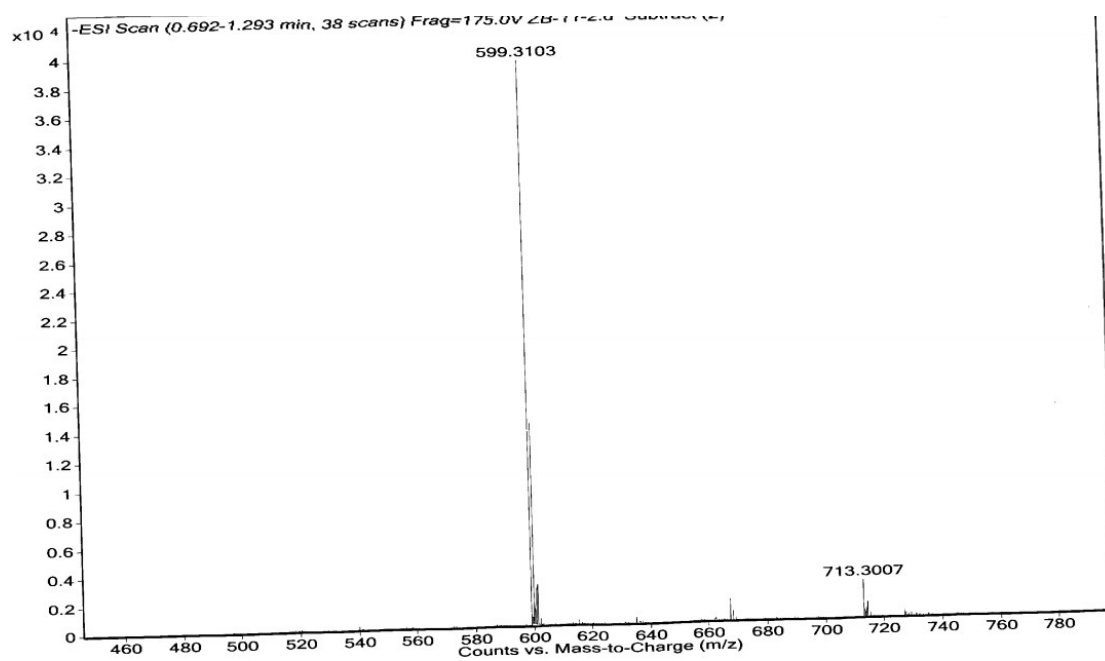

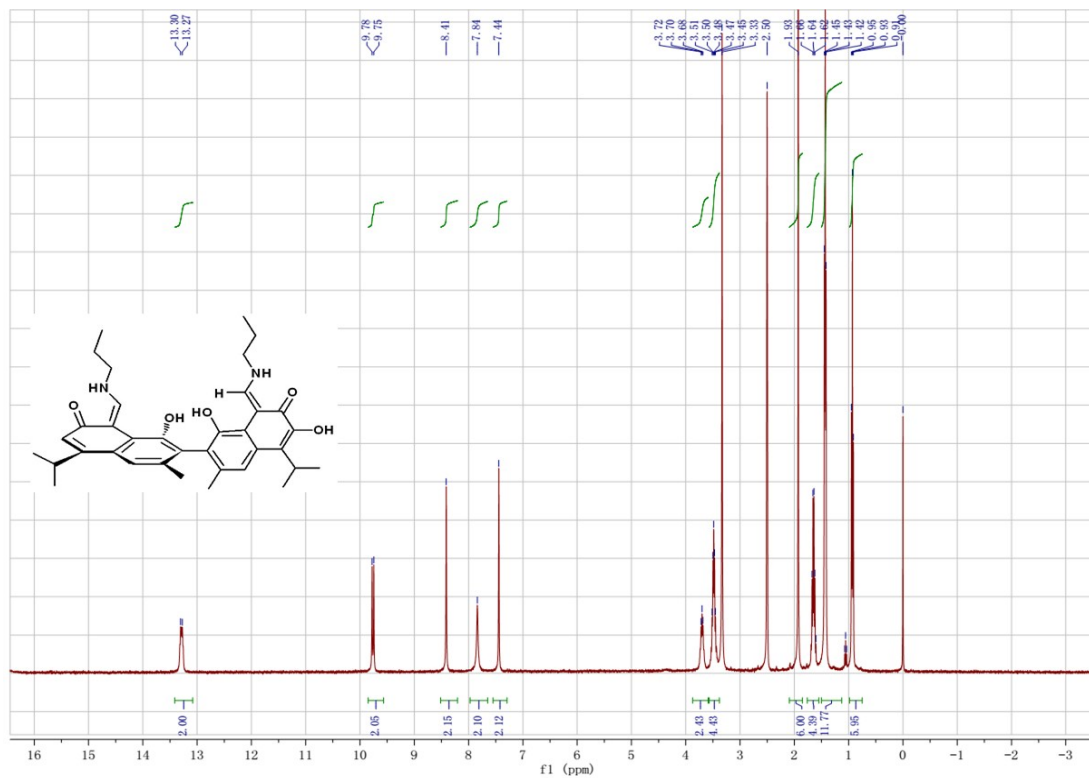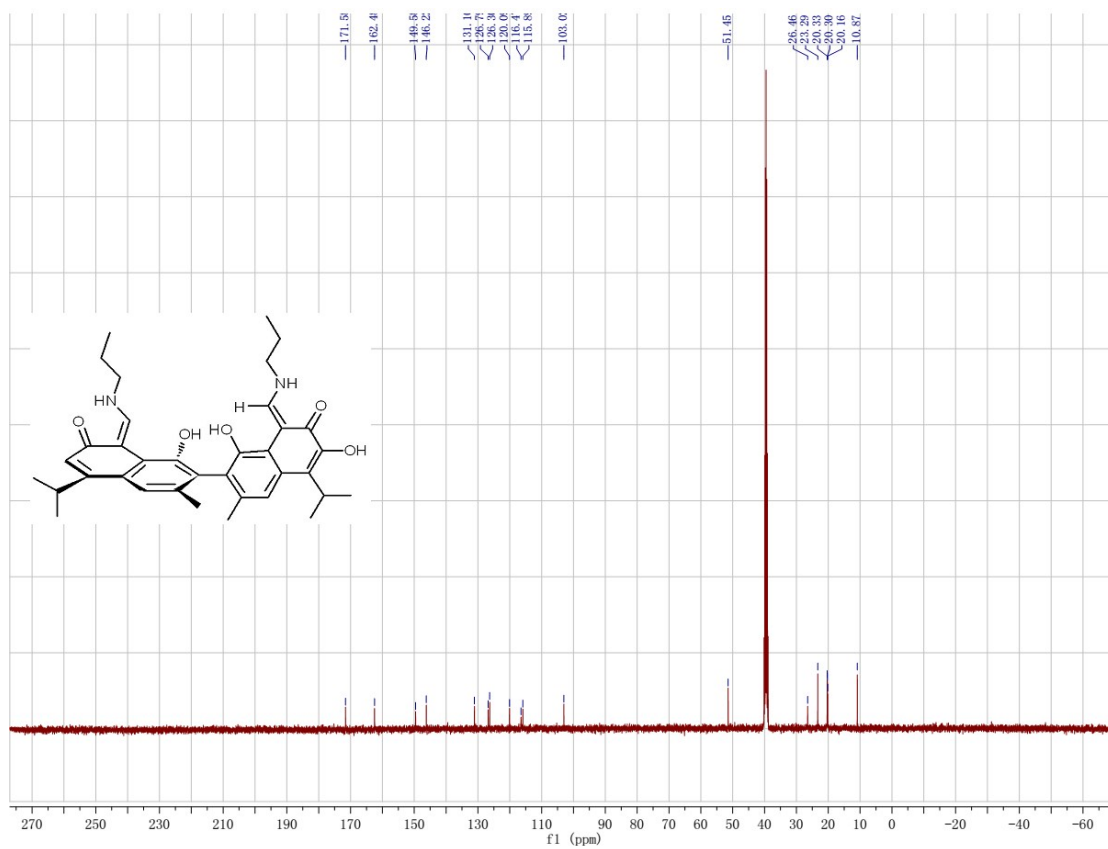

Figure S6. HRMS, <sup>1</sup>H NMR and <sup>13</sup>C NMR of compound 4.

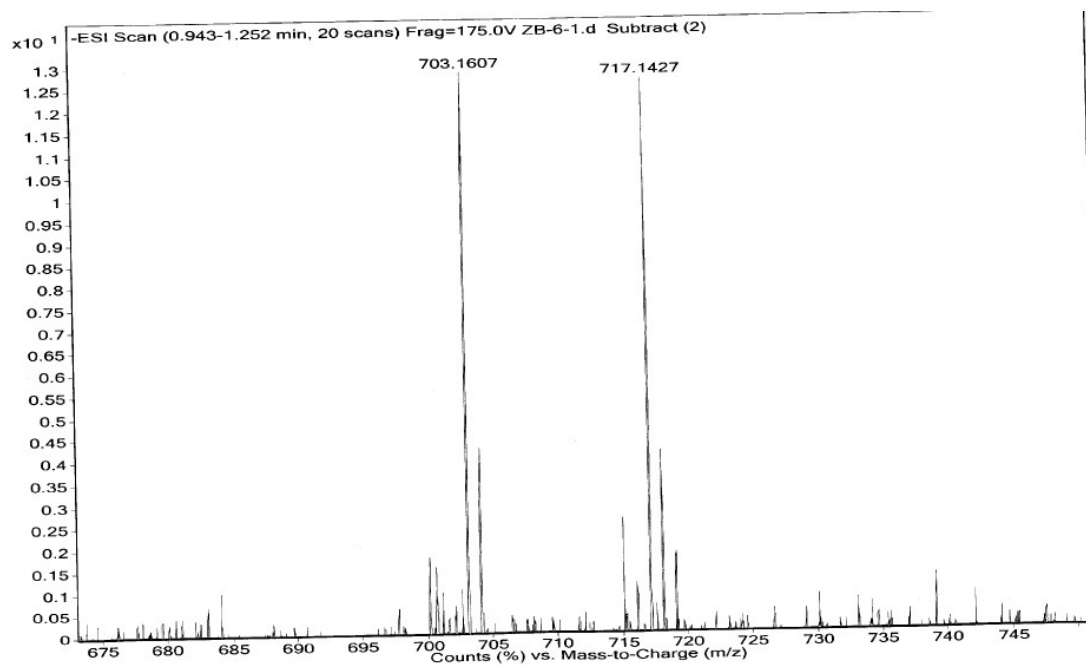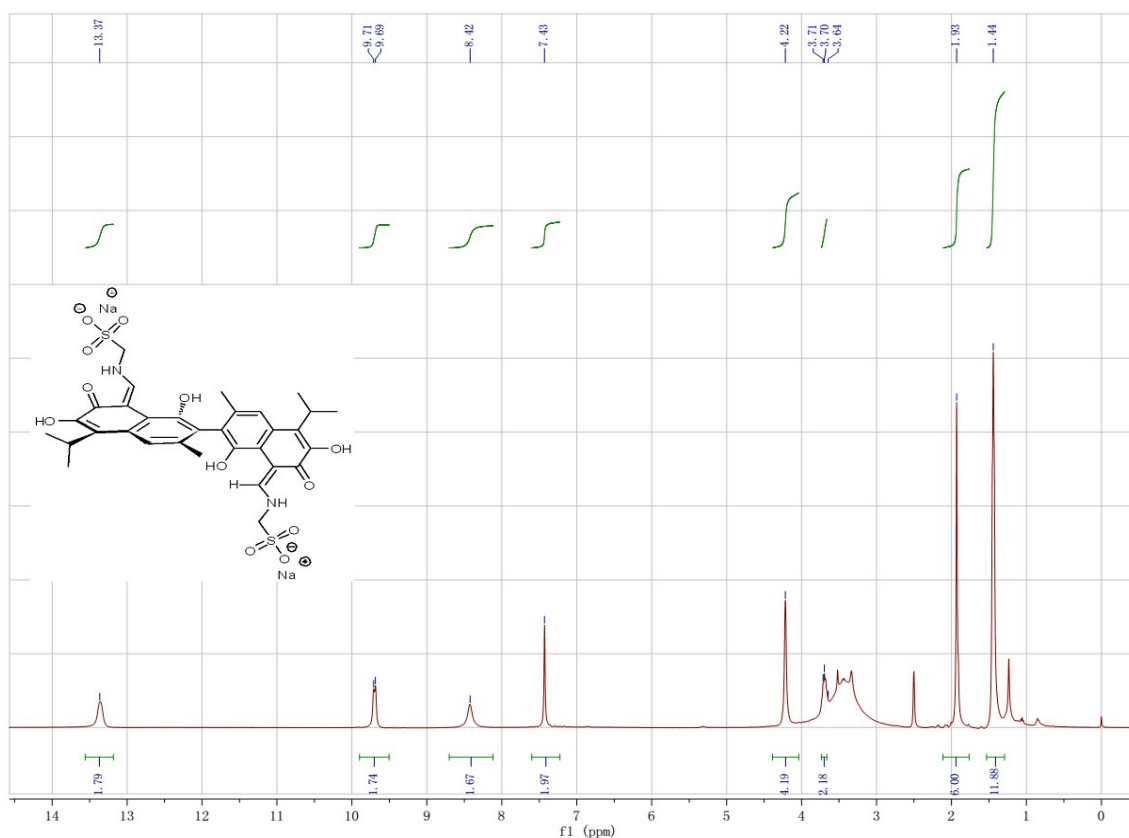

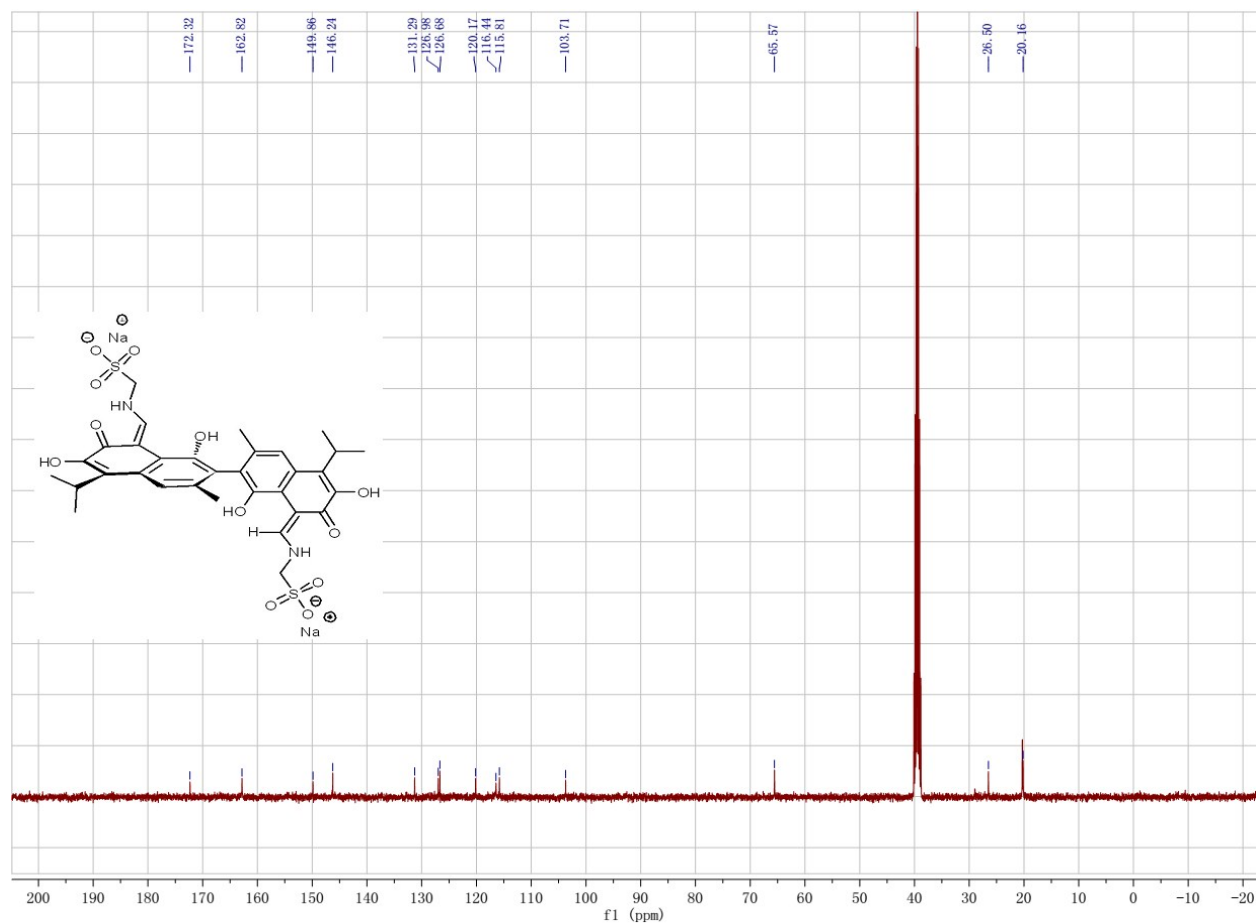

Figure S7. HRMS, <sup>1</sup>H NMR and <sup>13</sup>C NMR of compound 5.

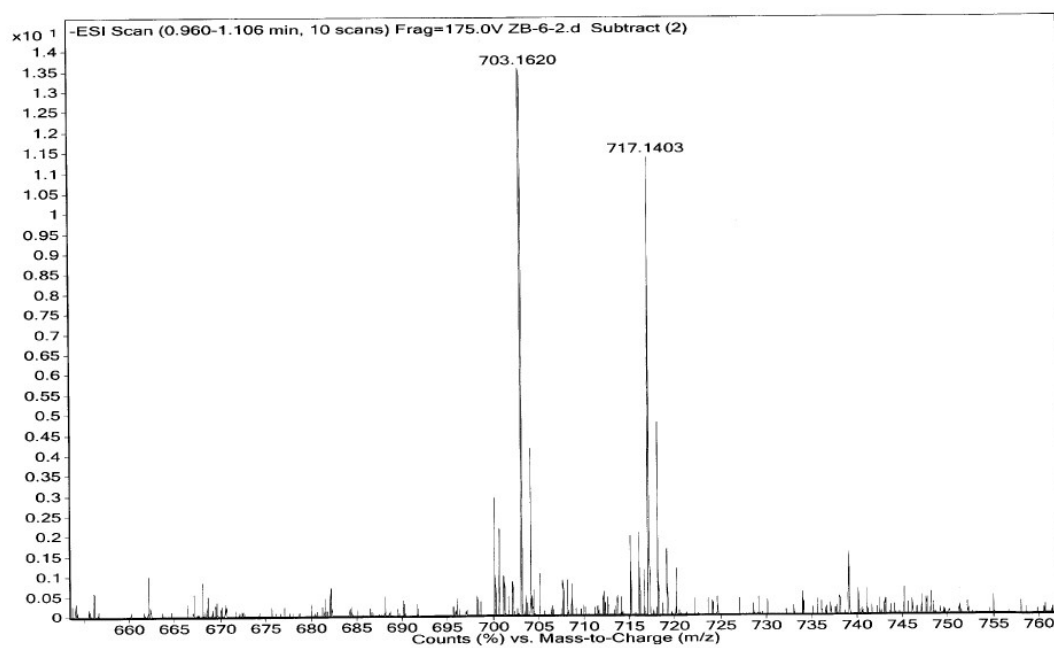

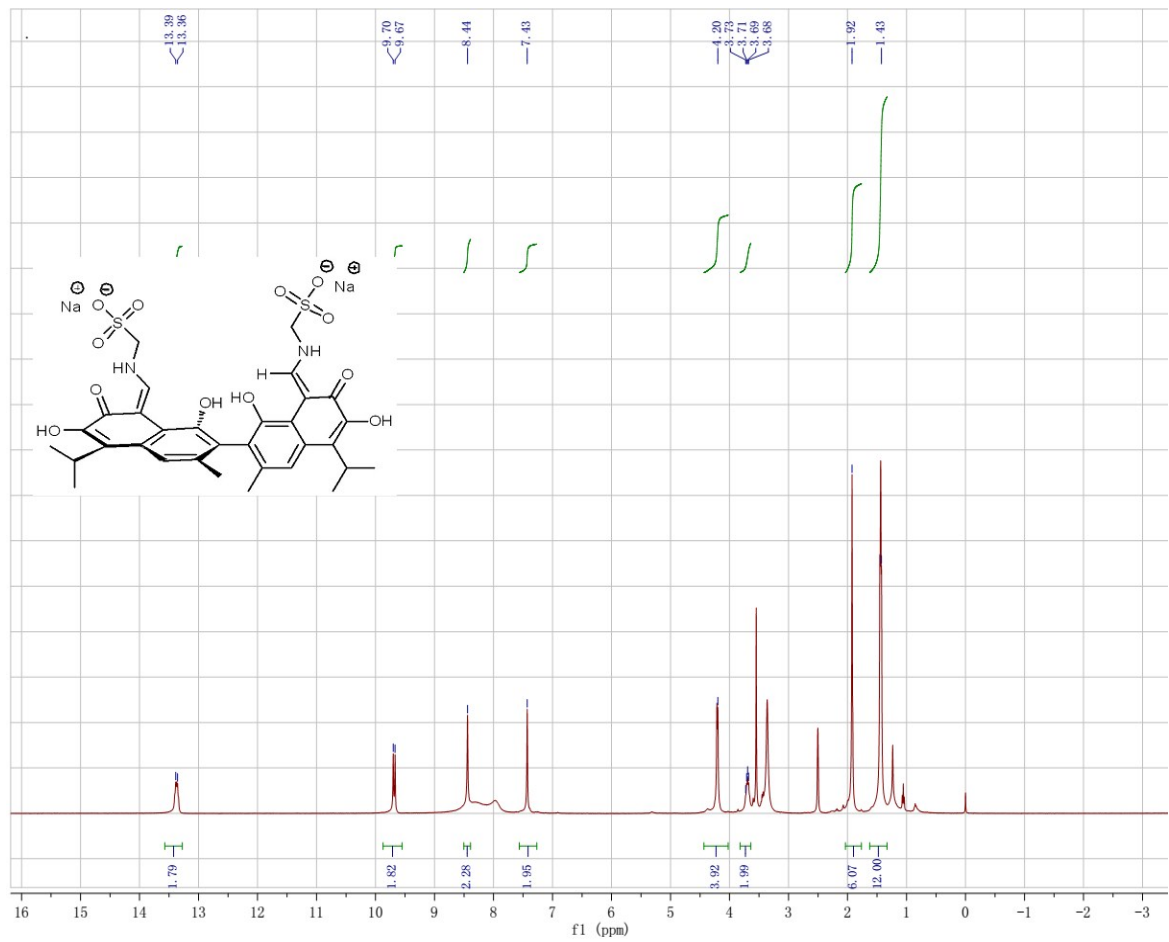



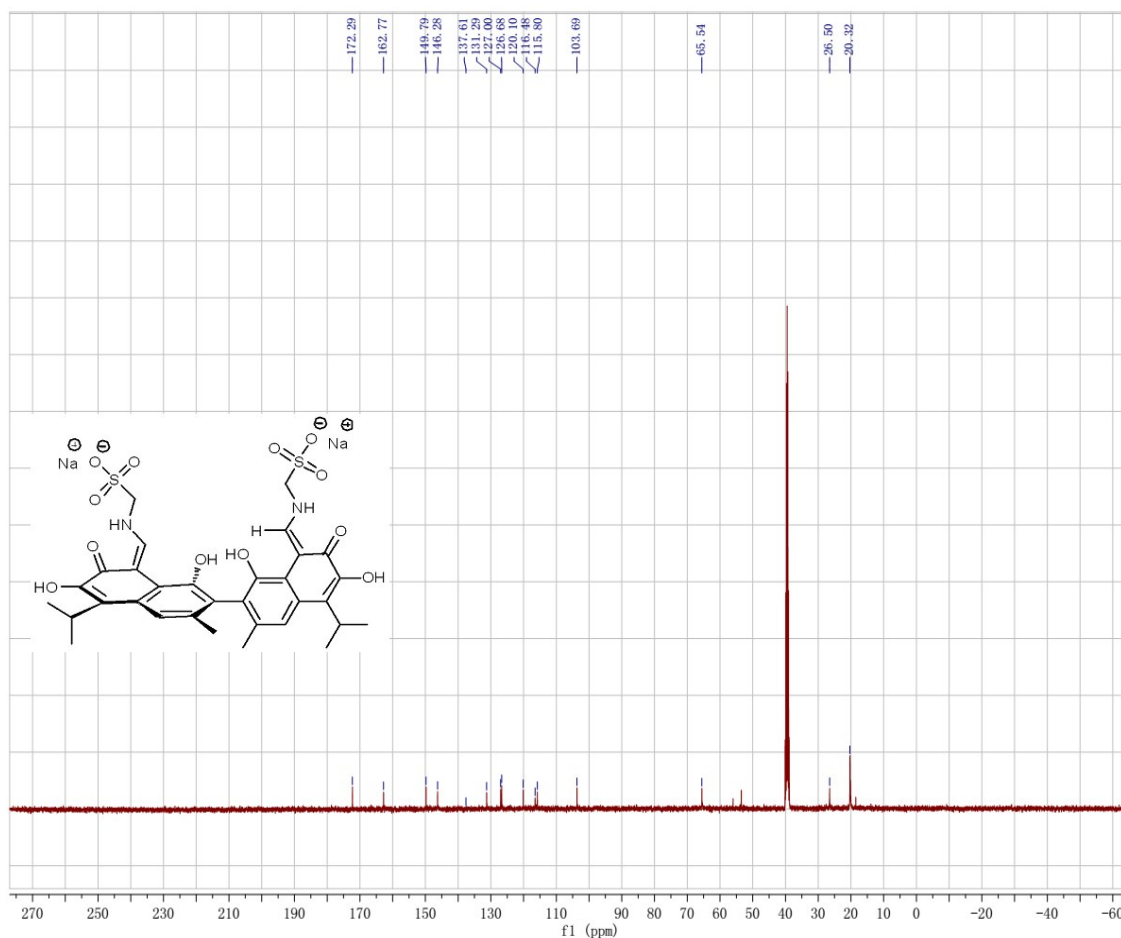

Figure S8. HRMS,  $^1\text{H}$  NMR and  $^{13}\text{C}$  NMR of compound 6.

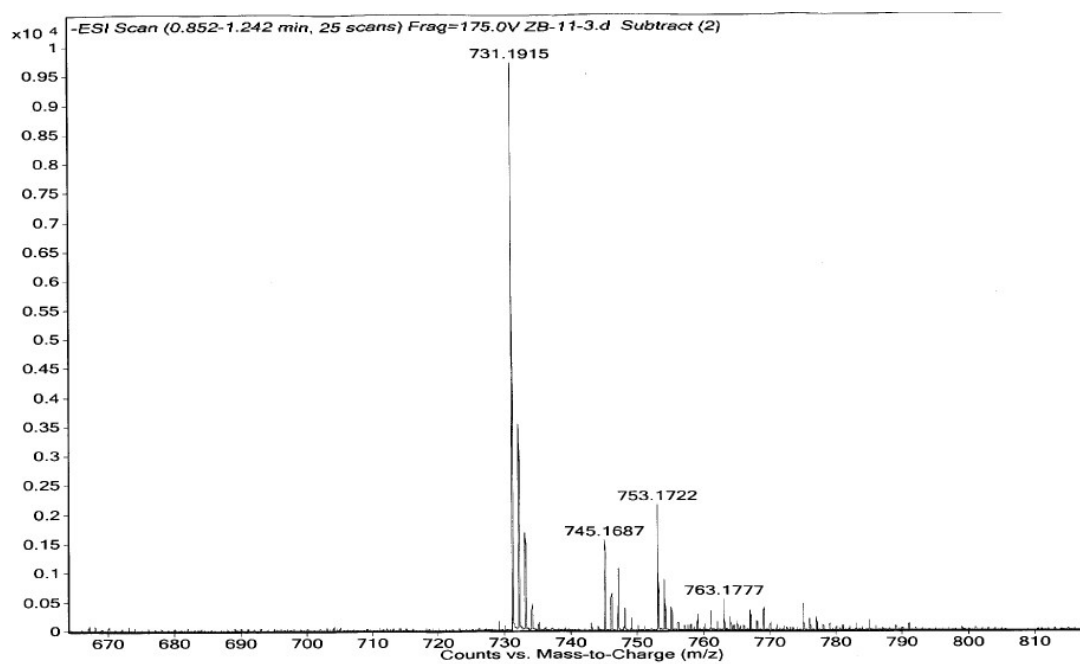

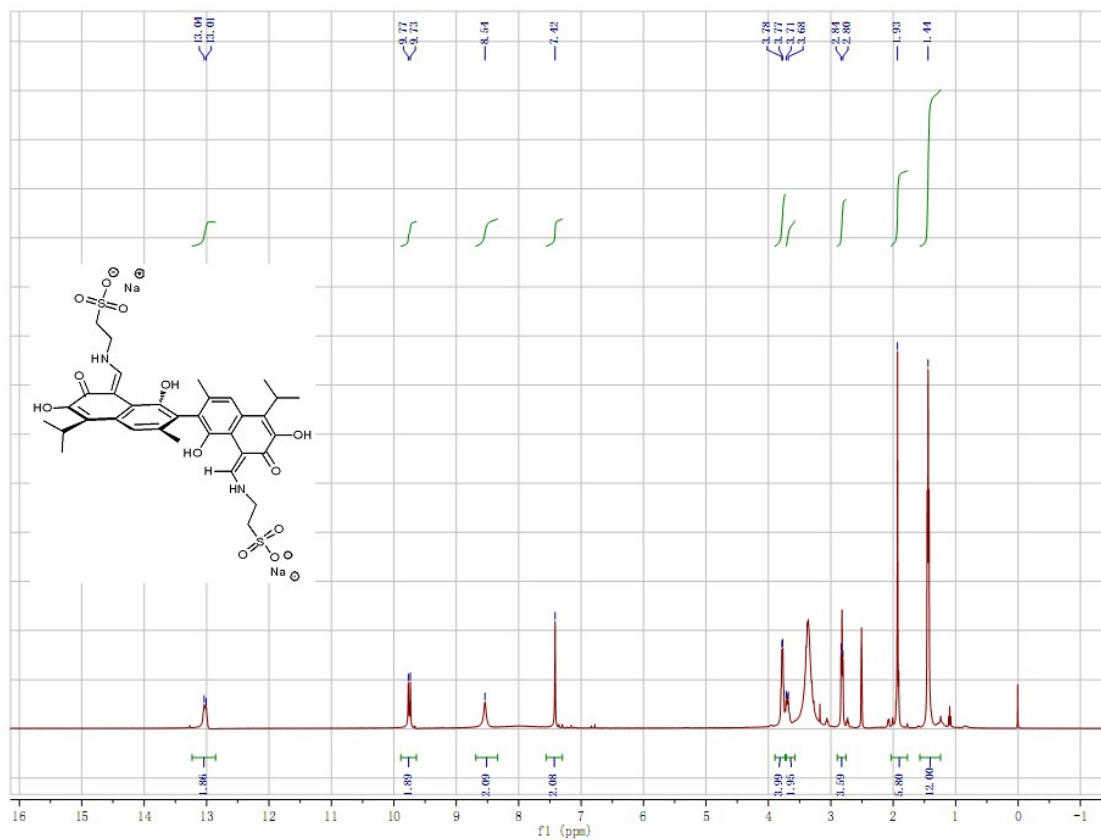

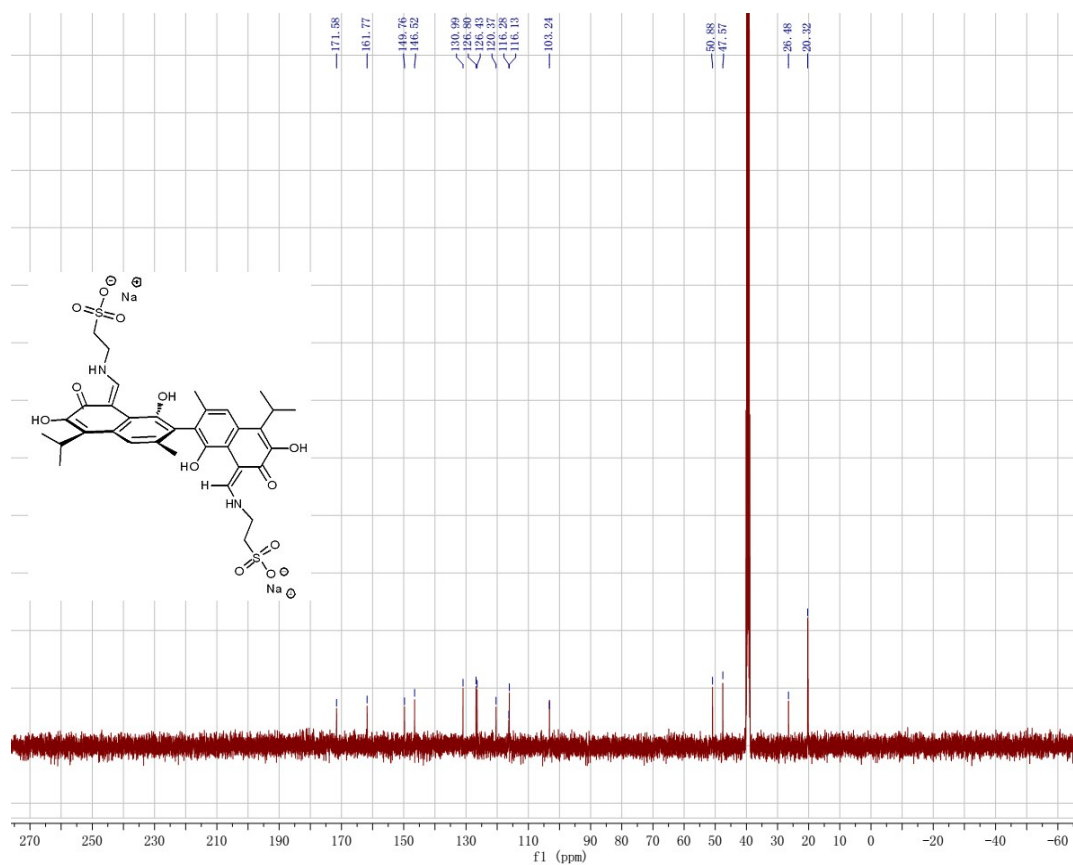

Figure S9. HRMS,  $^1\text{H}$  NMR and  $^{13}\text{C}$  NMR of compound 7.

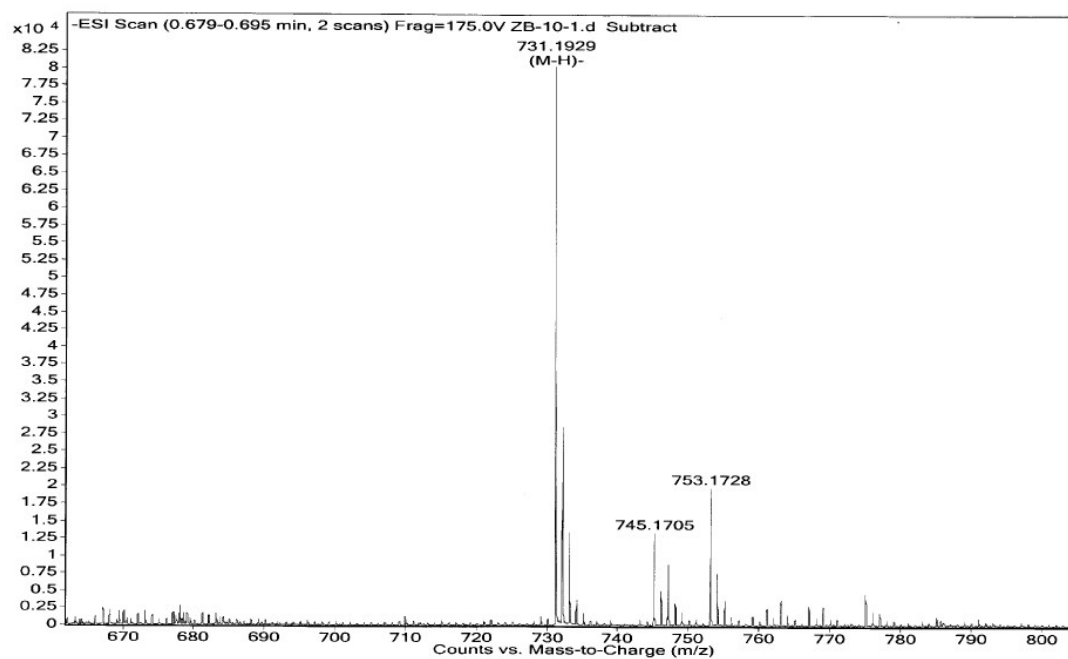

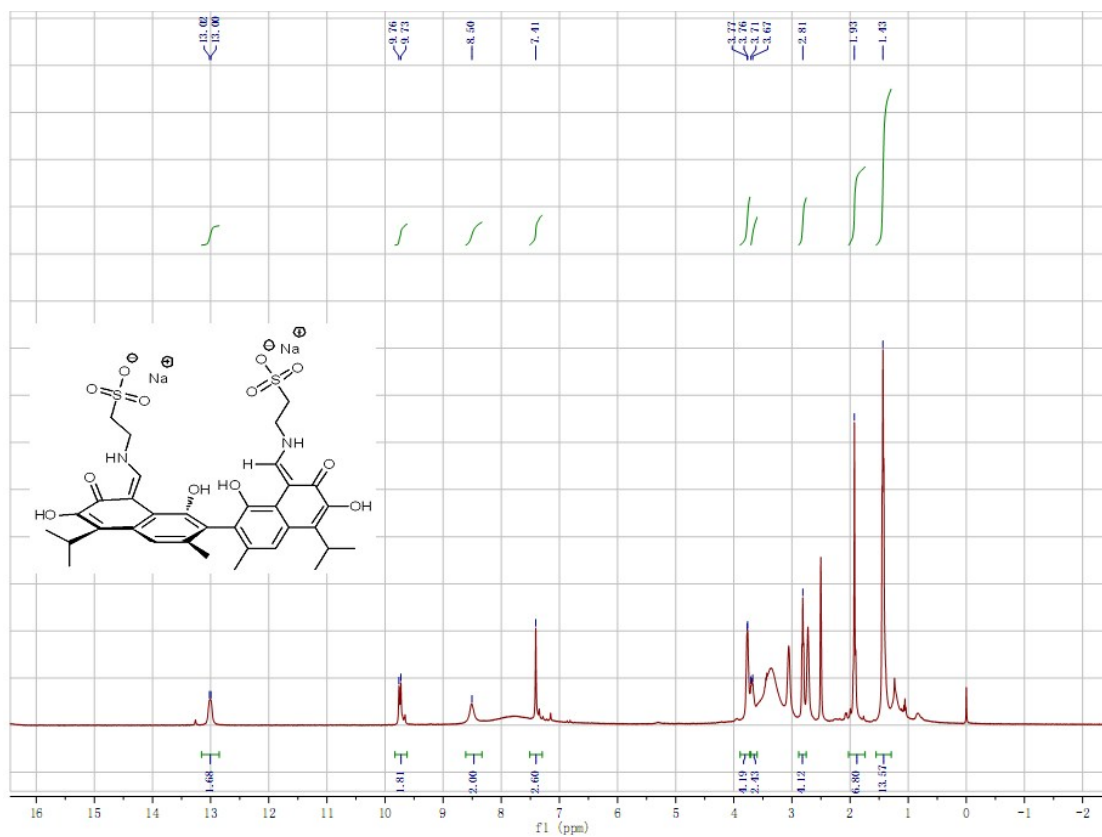

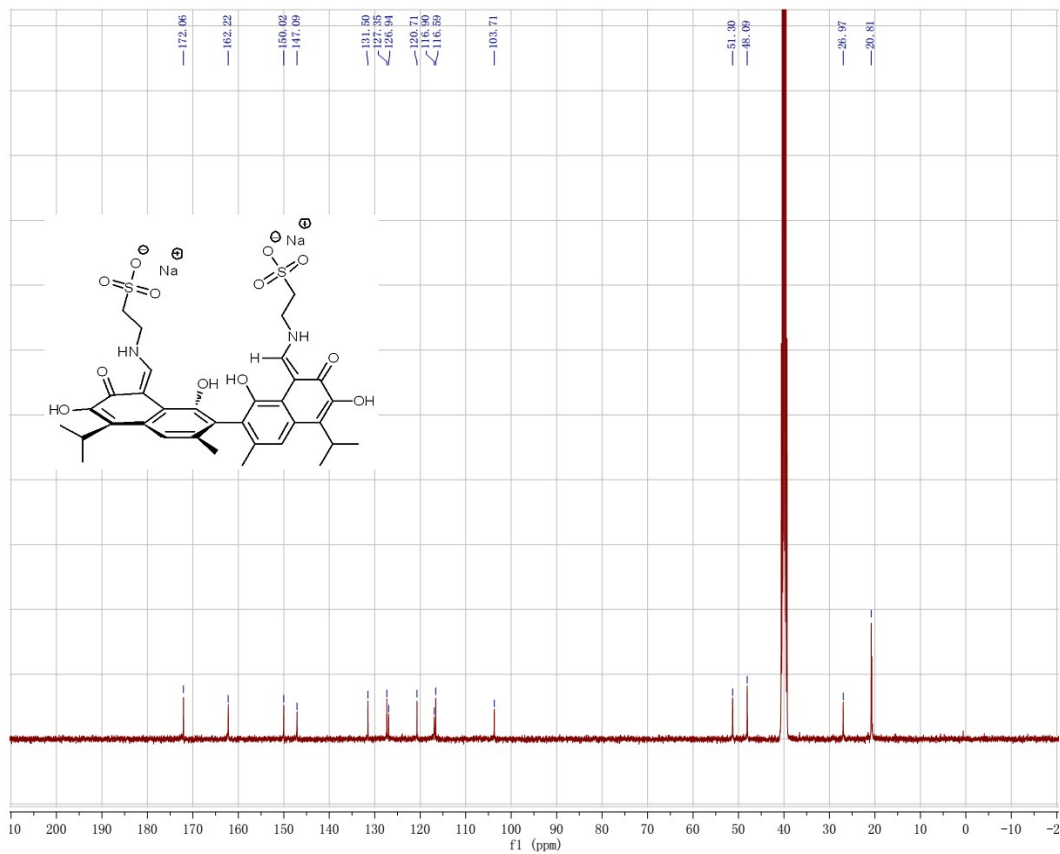

Figure S10. HRMS, <sup>1</sup>H NMR and <sup>13</sup>C NMR of compound 8.

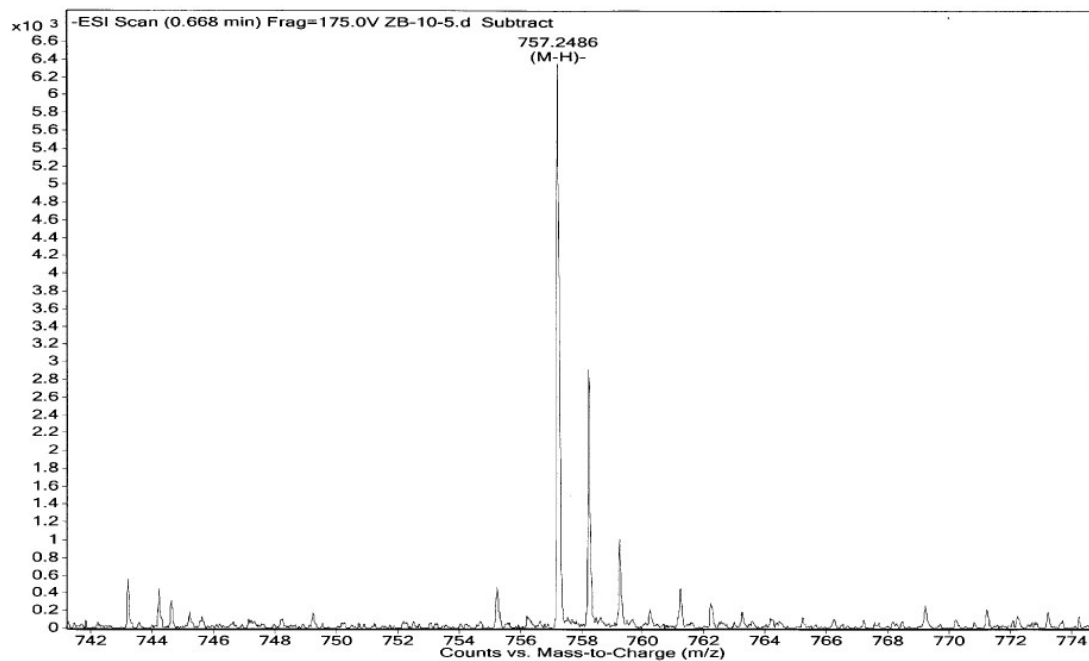

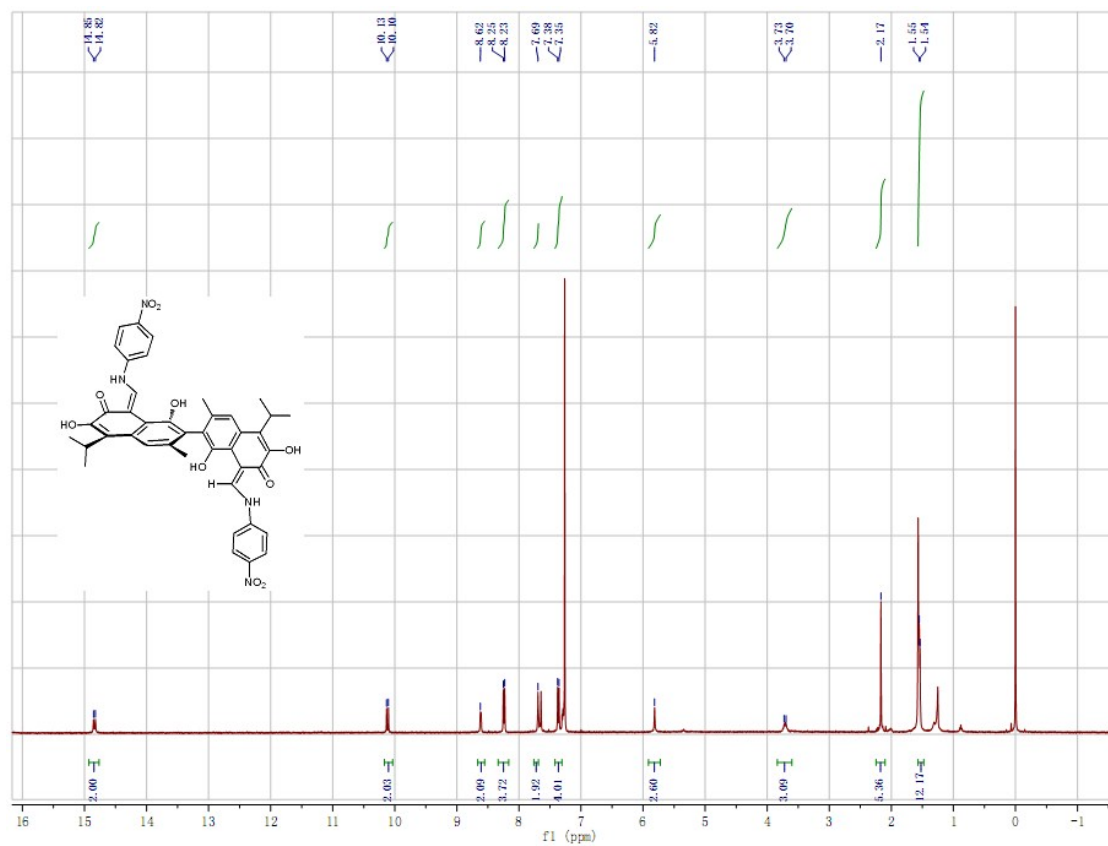

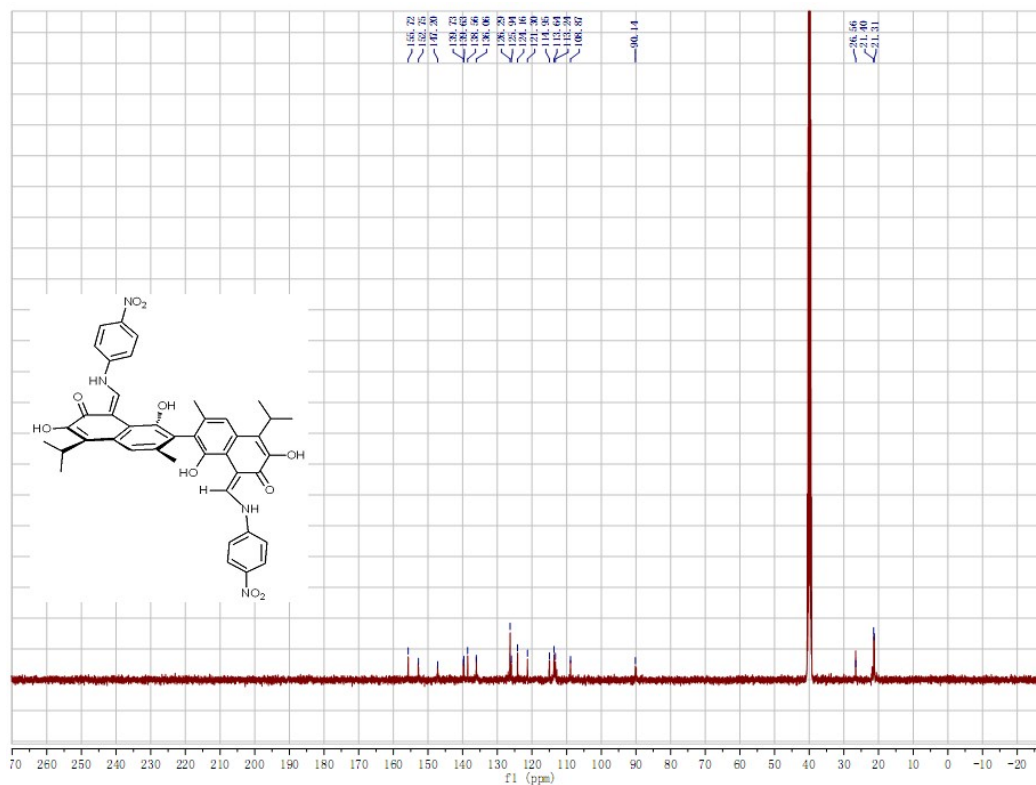

Figure S11. HRMS,  $^1\text{H}$  NMR and  $^{13}\text{C}$  NMR of compound 9.

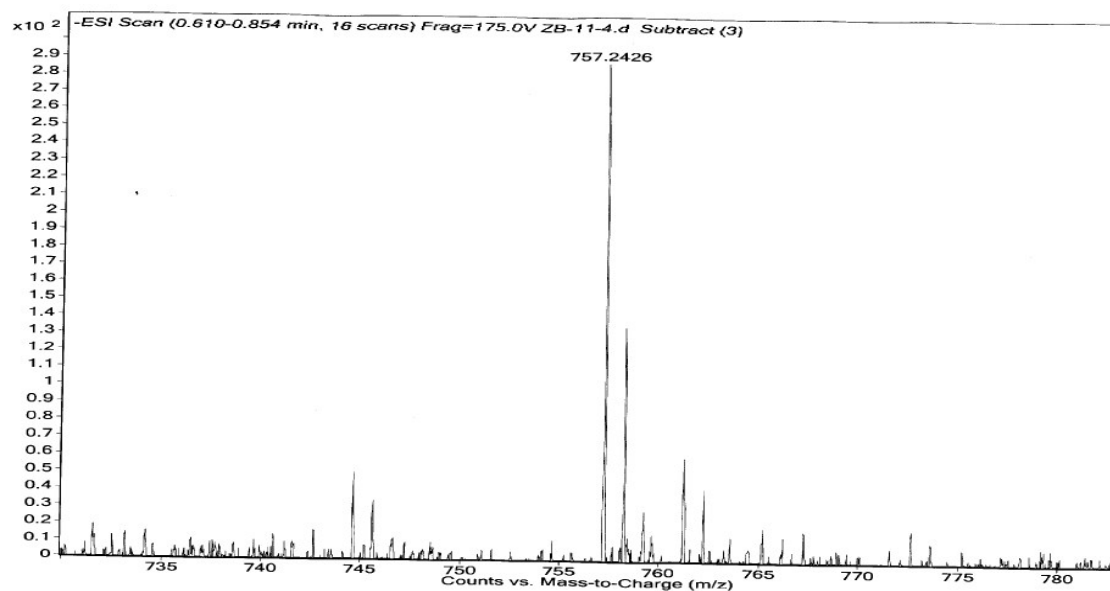

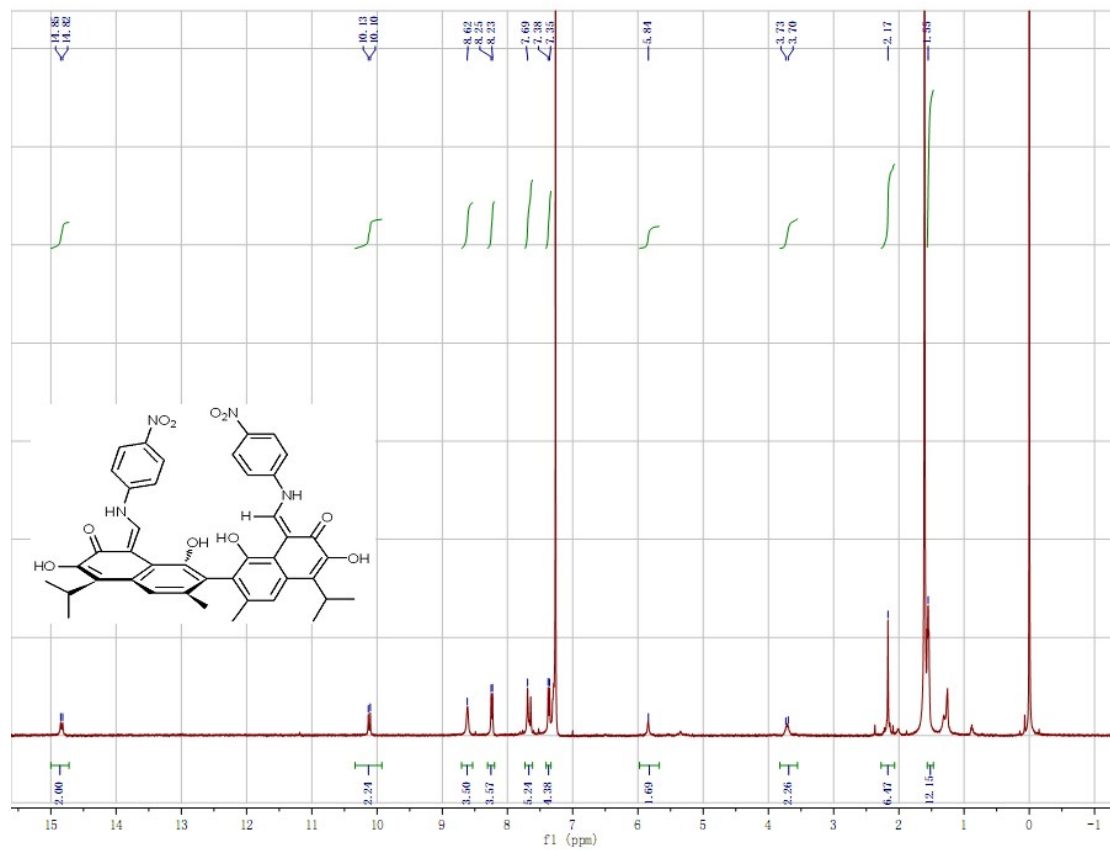



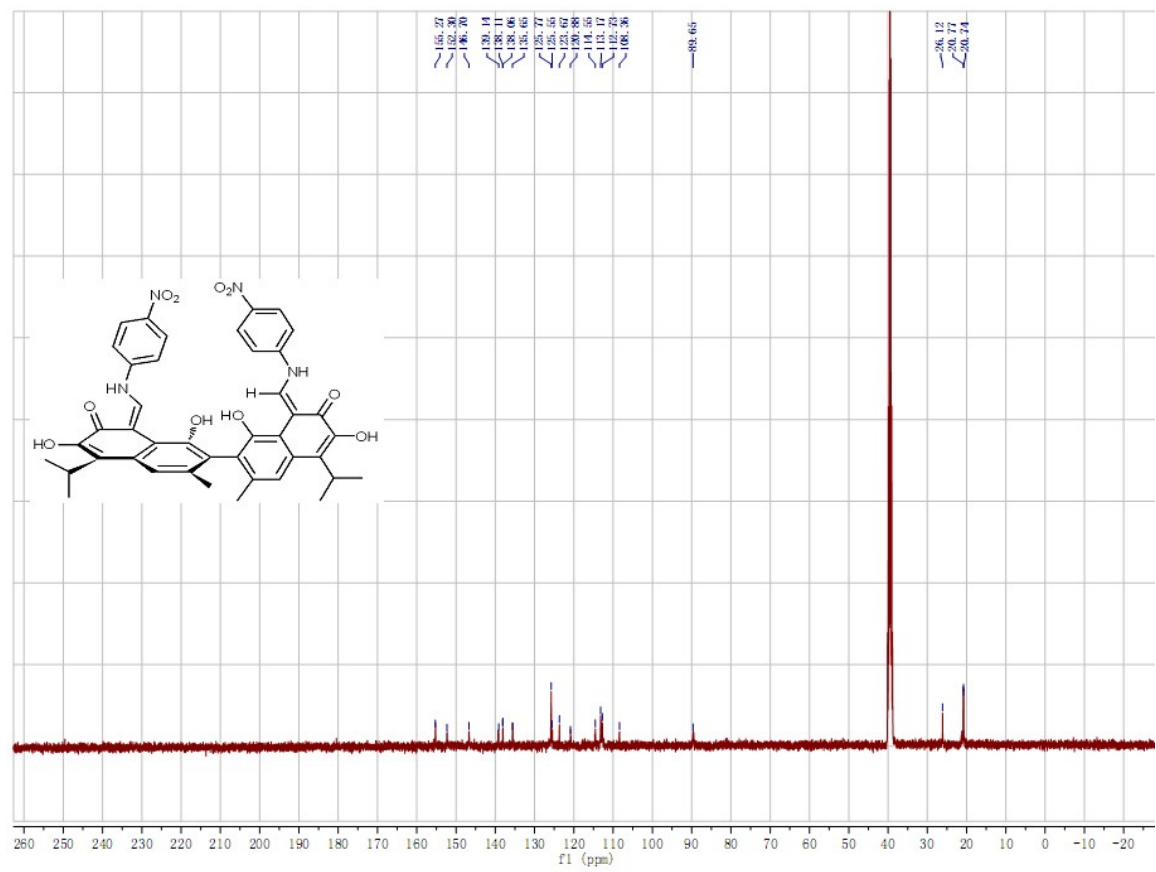

Figure S12. HRMS, <sup>1</sup>H NMR and <sup>13</sup>C NMR of compound 10

## Data of experiments

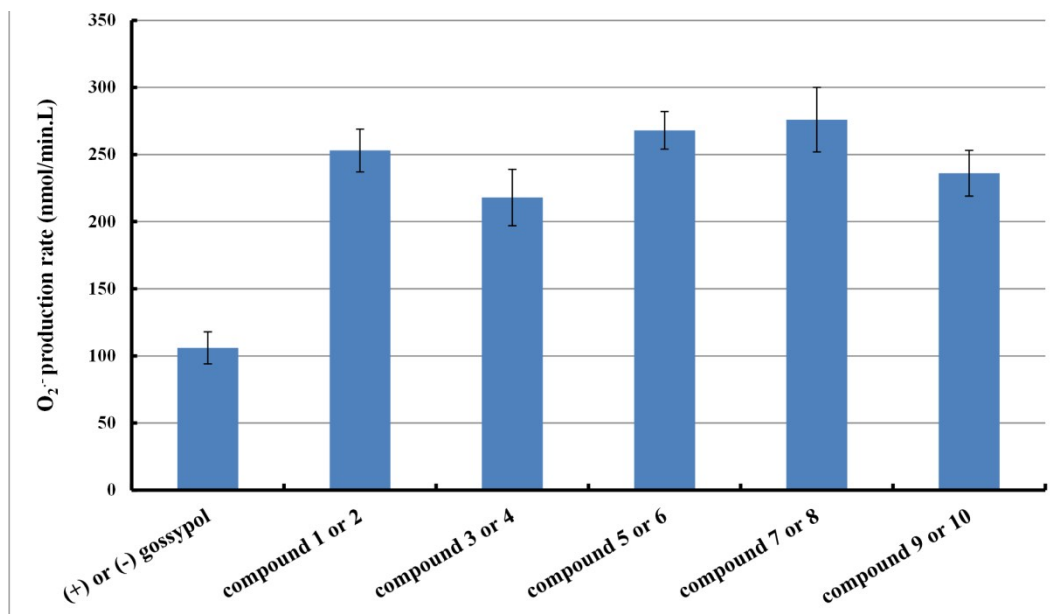

**Figure S13.** The O<sub>2</sub><sup>-</sup> production rate of (+), (-) -gossypol and their Schiff bases at a concentration of 500 µg/mL and time of 5 hs in the solution (DMF:H<sub>2</sub>O=1:10).

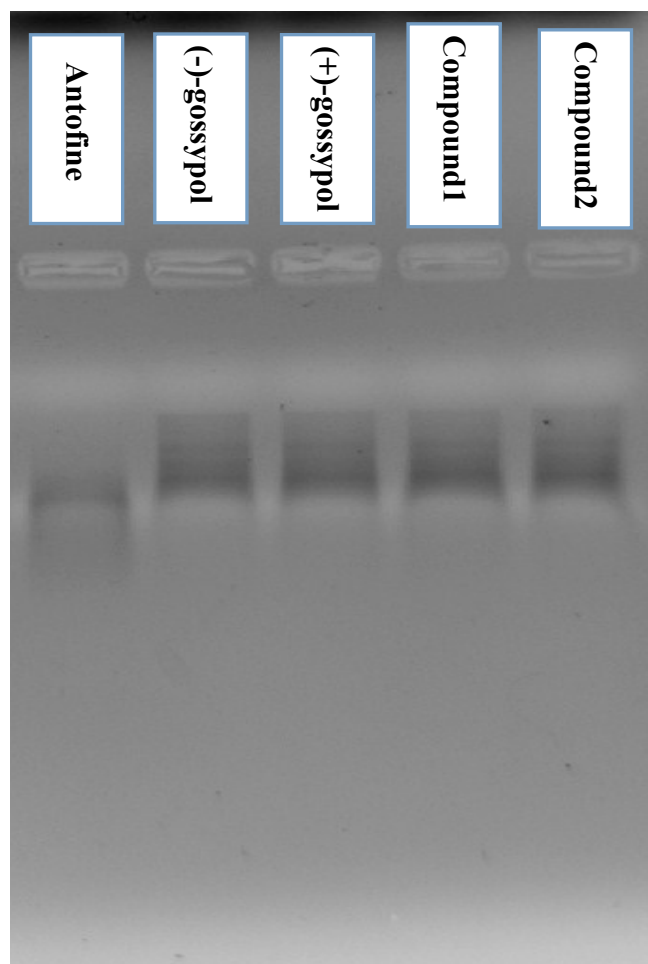

**Figure S14** The TMV RNA extracted from the assemble solution, which mixed with the antofine, (-)-gossypol, (+)-gossypol, compound 1 and compound 2, separately.

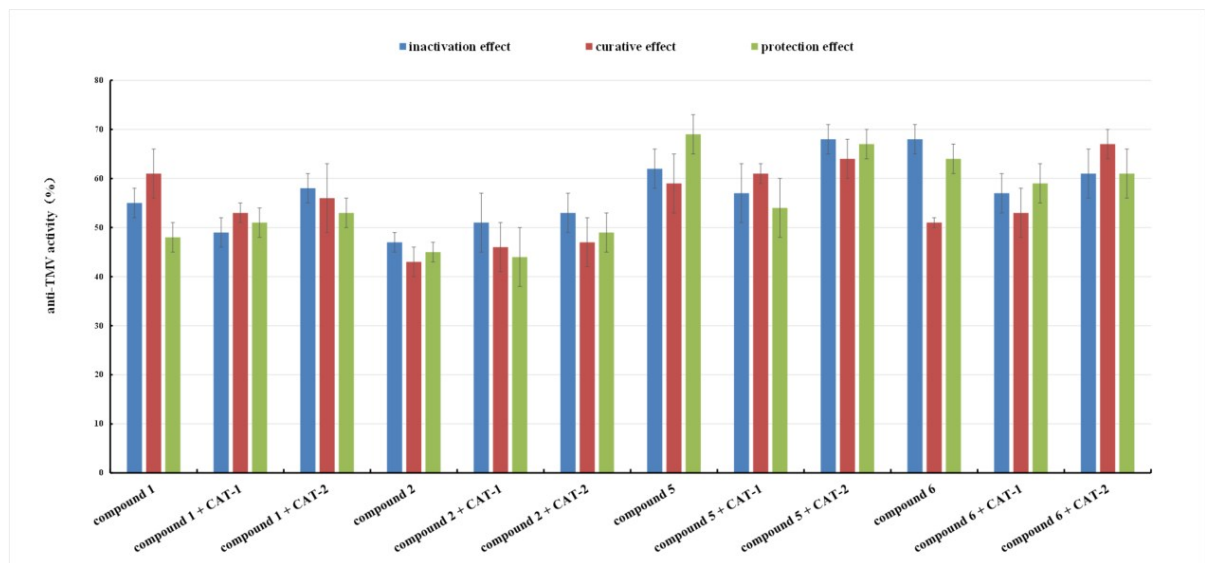

**Figure S15.** The anti-TMV activities of compound, compound + CAT-1, compound + CAT-2. Compound + CAT-1 refer to adding CAT 10 mins before the compound is applied to tobacco leaves, and compound + CAT-2 refer to adding CAT 10 mins after inoculation of tobacco leaves, which treated by compound for 24hs, with TMV. The means of three independent experiments  $\pm$  SD are shown.

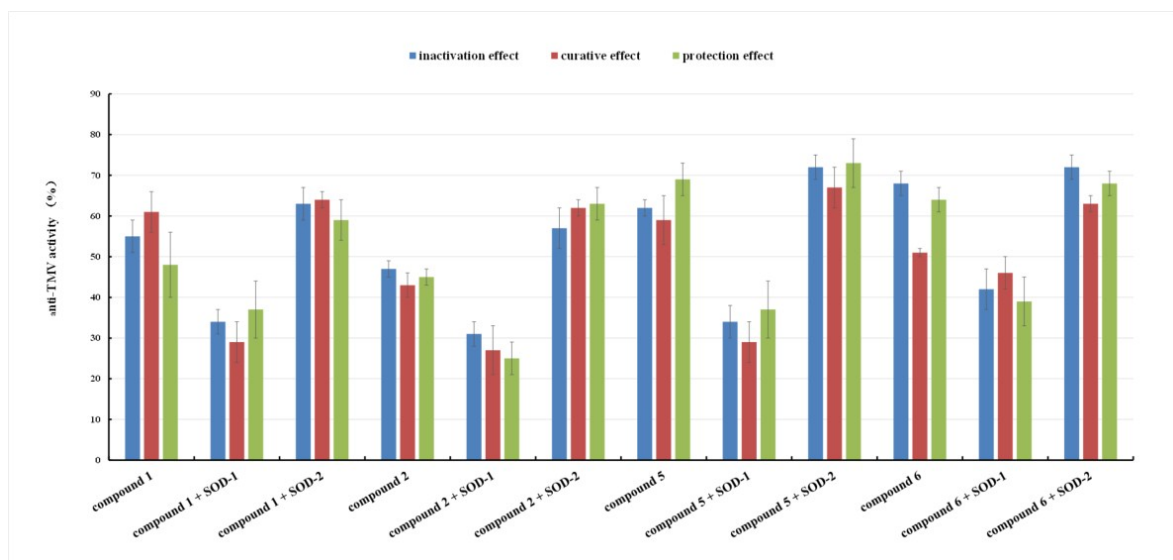

**Figure S16.** The anti-TMV activities of compound, compound + SOD-1, compound + SOD-2. Compound + SOD-1 refer to adding SOD 10 mins before the compound is applied to tobacco leaves, and compound + SOD-2 refer to adding SOD 10 mins after inoculation of tobacco leaves, which treated by compound for 24hs, with TMV. The means of three independent experiments  $\pm$  SD are shown.

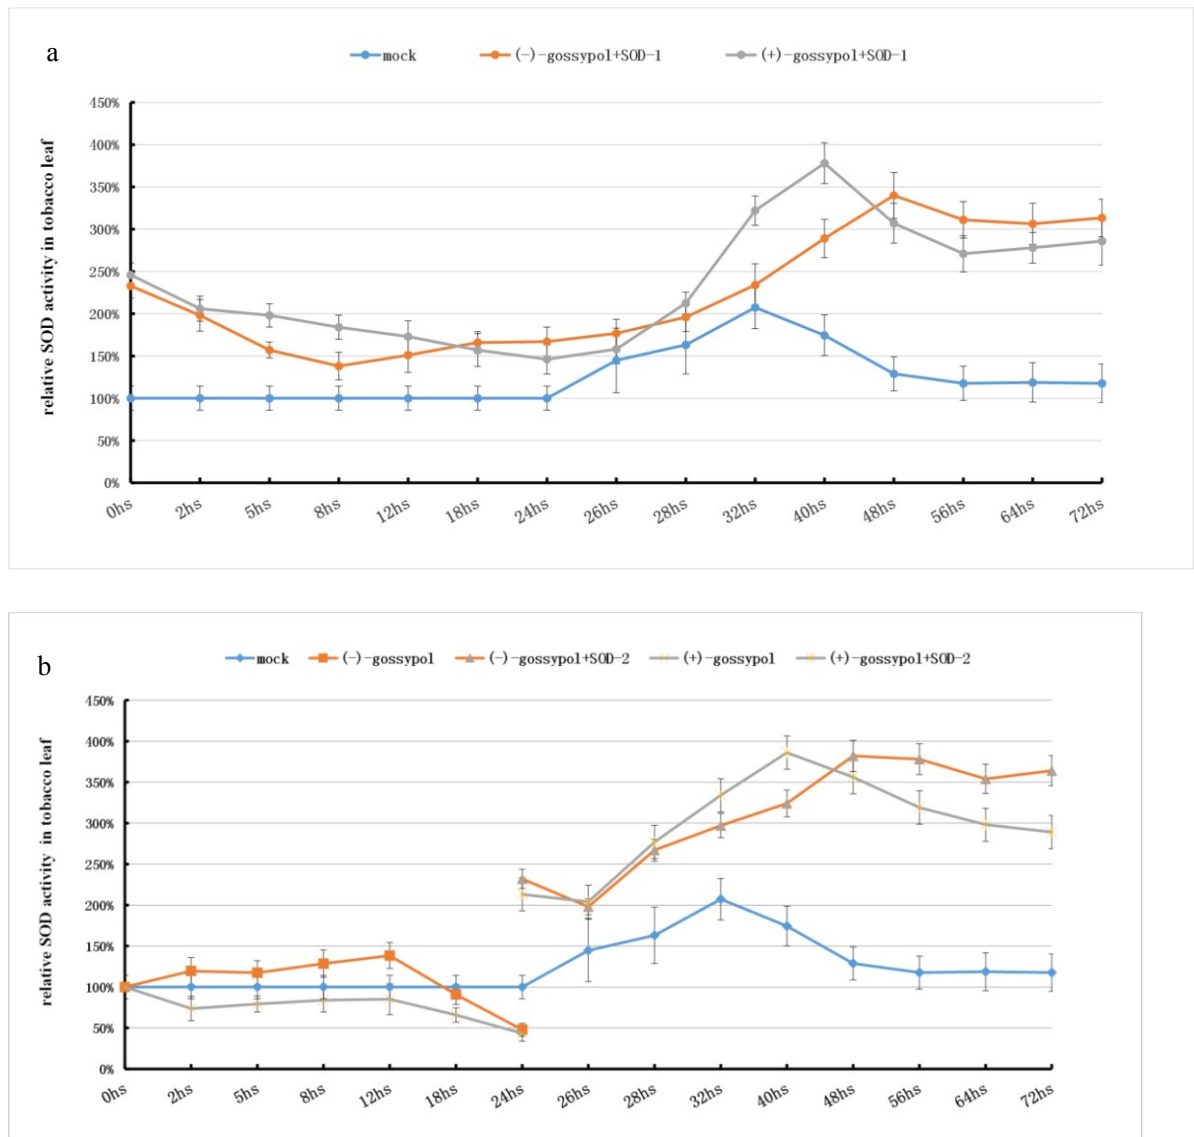

**Figure S17.** (a) The change of SOD activities in tobacco leaves treated by (-)-gossypol + SOD-1 and (+)-gossypol + SOD-1. (b) The change of SOD activities in tobacco leaves treated by (-)-gossypol + SOD-2 and (+)-gossypol + SOD-2. Compound + SOD-1 refer to adding SOD 10 mins before the compound is applied to tobacco leaves, and compound + SOD-2 refer to adding SOD 10 mins after inoculation of tobacco leaves, which treated by compound for 24hs, with TMV. The means of three independent experiments  $\pm$  SD are shown.

**Table S1.** The  $O_2^-$  production rate in tobacco leaf.

| position of leaves | data | the $O_2^-$ production rate at the time of 2 h |
|--------------------|------|------------------------------------------------|
|                    |      |                                                |

|        |                                    | Plant A | Plant B | Plant C | Plant D | Plant E |
|--------|------------------------------------|---------|---------|---------|---------|---------|
| Upper  | primary data<br>(nmol/mg.<br>min)  | 232     | 392     | 337     | 324     | 384     |
|        | reference<br>(nmol/mg.<br>min)     | 134     | 213     | 208     | 177     | 233     |
|        | relative data<br>(nmol/mg.<br>min) | 173%    | 184%    | 176%    | 183%    | 165%    |
| Middle | primary data<br>(nmol/mg.<br>min)  | 190     | 320     | 327     | 279     | 313     |
|        | reference<br>(nmol/mg.<br>min)     | 125     | 192     | 185     | 166     | 210     |
|        | relative data                      | 152%    | 167%    | 177%    | 168%    | 149%    |
| Lower  | primary data<br>(nmol/mg.<br>min)  | 177     | 276     | 266     | 236     | 264     |
|        | reference<br>(nmol/mg.<br>min)     | 113     | 179     | 164     | 151     | 193     |
|        | relative data                      | 157%    | 154%    | 162%    | 156%    | 137%    |
